# Supplementary material for: A nonalternant azulene-embedded carbon nanohoop featuring anti-Kasha emission and tunable properties upon pH stimuli-responsiveness
Source: Royal Society of Chemistry journal article supplement (doi:10.1039/d2tc04321a), 2022-12-16
Supplement: d2tc04321a1.pdf [file d2tc04321a1.pdf]

## Supporting Information

### **A Nonalternant azulene-embedded carbon nanohoop featuring anti-kasha emission and tunable properties upon pH stimuli-responsiveness**

Xiaonan Li,<sup>a</sup> Luyang Jia,<sup>a</sup> Wenguang Wang,<sup>a</sup> Ying Wang,<sup>a</sup> Di Sun,<sup>b</sup> and Hua Jiang<sup>\*a</sup>

<sup>a</sup>College of Chemistry, Beijing Normal University, Beijing 100875 (P.R. China)

<sup>b</sup>School of Chemistry and Chemical Engineering, Shandong University, Jinan 250100 (P.R. China)

#### Table of Contents

|                                                                                                                                     |    |
|-------------------------------------------------------------------------------------------------------------------------------------|----|
| <b>1. General Procedures and Materials.</b> .....                                                                                   | 2  |
| <b>2. Synthesis Procedures</b> .....                                                                                                | 2  |
| <b>3. NMR and Mass Spectra</b> .....                                                                                                | 3  |
| <b>4. X-ray Crystallography</b> .....                                                                                               | 7  |
| <b>5. Proton-responsive behavior of 1,3-Az[9]CPP by NMR titration experiment.</b> .....                                             | 9  |
| <b>6. Proton-responsive behavior of 1,3-Az[9]CPP by UV-Vis titration experiment</b> .....                                           | 10 |
| <b>7. Fluorescence spectra of 1,3-Az[9]CPP and 1,3-Az[9]CPP-H<sup>+</sup></b> .....                                                 | 11 |
| <b>8. UV-Vis titration experiments of complexation between 1,3-Az[9]CPP-H<sup>+</sup> with C<sub>70</sub></b> .....                 | 11 |
| <b>9. NMR titration experiments of complexation between 1,3-Az[9]CPP-H<sup>+</sup> with C<sub>60</sub> and C<sub>70</sub></b> ..... | 13 |
| <b>10. Theoretical Calculations</b> .....                                                                                           | 13 |
| <b>References</b> .....                                                                                                             | 35 |

## 1. General Procedures and Materials.

All starting chemicals were obtained from commercial sources and used without further purification, unless indicated otherwise. All reactions were performed with dry solvents under Argon in dried glassware with standard vacuum-line techniques. Anhydrous THF, 1,4-dioxane and toluene were obtained from Solvent Purification System. Compound **1**,<sup>1</sup> **2**,<sup>3</sup> **3**,<sup>4</sup> **4**<sup>5</sup> and **5**<sup>6</sup> prepared according to the literatures. Analytical TLC was carried out using tapered silica plates with a preadsorbent zone. NMR spectra were obtained with JEOL Delta (400 MHz and 600 MHz) using dichloromethane-*d* (CD<sub>2</sub>Cl<sub>2</sub>) and chloroform-*d* (CDCl<sub>3</sub>) as solvent. The chemical shift references were as follows: (<sup>1</sup>H) dichloromethane-*d*, 5.32 ppm; (<sup>13</sup>C) dichloromethane-*d*, 53.84; (<sup>1</sup>H) chloroform-*d*, 7.26 ppm; (<sup>13</sup>C) chloroform-*d*, 77.16 ppm. The following abbreviations (or combinations thereof) were used to explain the multiplicities : s = singlet, d = doublet, t = triplet, m = multiplet. Mass spectra (ESI, MALDI) were acquired on GCT and FTICR spectrometer (Bruker Daltonics Inc. APEXII, BIFLEX III), respectively. UV-Vis spectra were recorded on Shimadzu UV-3600 and Fluorescence spectra were measured on FS5. Cyclic voltammetry (CV) and differential pulse voltammetry (DPV) experiments were carried out at room temperature with an electrochemical workstation from Chenhua Instruments Co. (Shanghai, China). Cyclic voltammetry (CV) and differential pulse voltammetry (DPV) were measured with a glass carbon electrode for 1,1,2,2-tetrachloroethane solution of a sample (1 mM) in the presence of an supporting electrolyte (Bu<sub>4</sub>NPF<sub>6</sub>, 0.2 M) at room temperature under nitrogen atmosphere and the scan rates at 100 mV/s. The potential was externally calibrated against the Fc/Fc<sup>+</sup> couple at 0.410 V versus a Ag electrode.

## 2. Synthesis Procedures

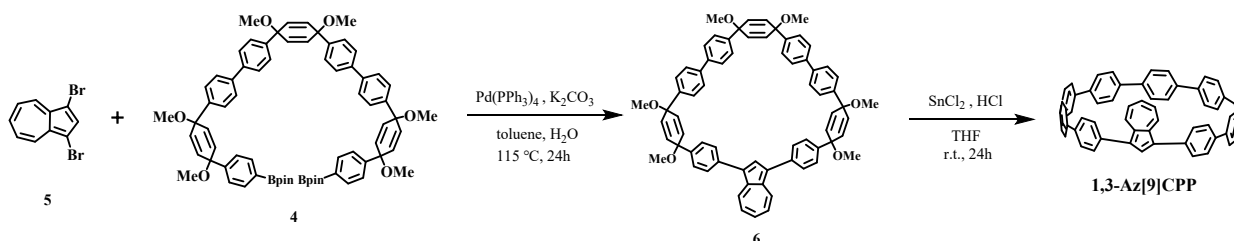

To a dried 250 mL flask containing a magnetic stirring bar were added **5** (120 mg, 0.42 mmol, 1.0 eq), **4** (472.1 mg, 0.42 mmol, 1.0 eq), Pd(PPh<sub>3</sub>)<sub>4</sub> (97 mg, 0.084 mmol, 0.2 eq), K<sub>2</sub>CO<sub>3</sub> (3.4 g, 24.64 mmol, 58.7 eq) and 3 drops of Aliquat 336. The flask was evacuated and filled with argon three times. Dry toluene (106 mL) and the degassed distilled water (13 mL) was added via syringe. Then, the mixture was deoxygenated and freeze-pump-thawed (3×) and then was allowed to react at 115 °C for 1 day. After the reaction mixture was cooled, the mixture was extracted with ethyl acetate, washed with water and saturated brine. The combined organic phase was dried over sodium sulfate and consequently concentrated under reduced pressure. The crude product was initially purified by column chromatography on silica gel (PE/EA = 2/1, v/v) to afford a blue solid as the crude macrocyclic precursor **6** that was used in the next step without further purification.

A H<sub>2</sub>SnCl<sub>4</sub>/THF solution was freshly prepared by dissolving anhydrous SnCl<sub>2</sub> (283 mg, 1.49 mmol) in 5.2 mL anhydrous THF under Ar atmosphere and then adding concentrated HCl (aq) (0.2 mL) to the solution. The resulting solution was deoxygenated and stirred for 30 minutes. Crude product **6** (106 mg) was dissolved in anhydrous THF (11 mL) under the Ar atmosphere and the freshly prepared H<sub>2</sub>SnCl<sub>4</sub>/THF solution was added to this solution. The reaction mixture was stirred at room temperature for 1 day before being quenched with NaOH/H<sub>2</sub>O solution. The aqueous layer was extracted with dichloromethane and the organic layers were combined and dried with anhydrous sodium sulfate. After purifying by column chromatography on silica gel (petroleum ether/DCM = 1.5/1, v/v) to get 1,3-Az[9]CPP as a green solid (21 mg, 24 %). M.p. > 300 °C. <sup>1</sup>H NMR (600 MHz, CD<sub>2</sub>Cl<sub>2</sub>, 298 K) δ: 8.70-8.67 (m, 2H), 7.66 (t, J = 10.0 Hz, 1H), 7.62-7.55 (m, 36H), 7.28 (s, 1H), 7.22 (t, J = 9.9 Hz, 2H). <sup>13</sup>C NMR (100 MHz, CD<sub>2</sub>Cl<sub>2</sub>, 298 K) δ: 145.1, 139.4, 138.8, 138.7, 138.6, 138.3, 137.2, 136.8, 136.2, 131.2, 130.1, 127.8, 127.7, 127.7, 124.2. HR-MS (MALDI-TOF) calculated for calculated for C<sub>64</sub>H<sub>42</sub> M: 810.3287, found 810.3310.

### 3. NMR and Mass Spectra

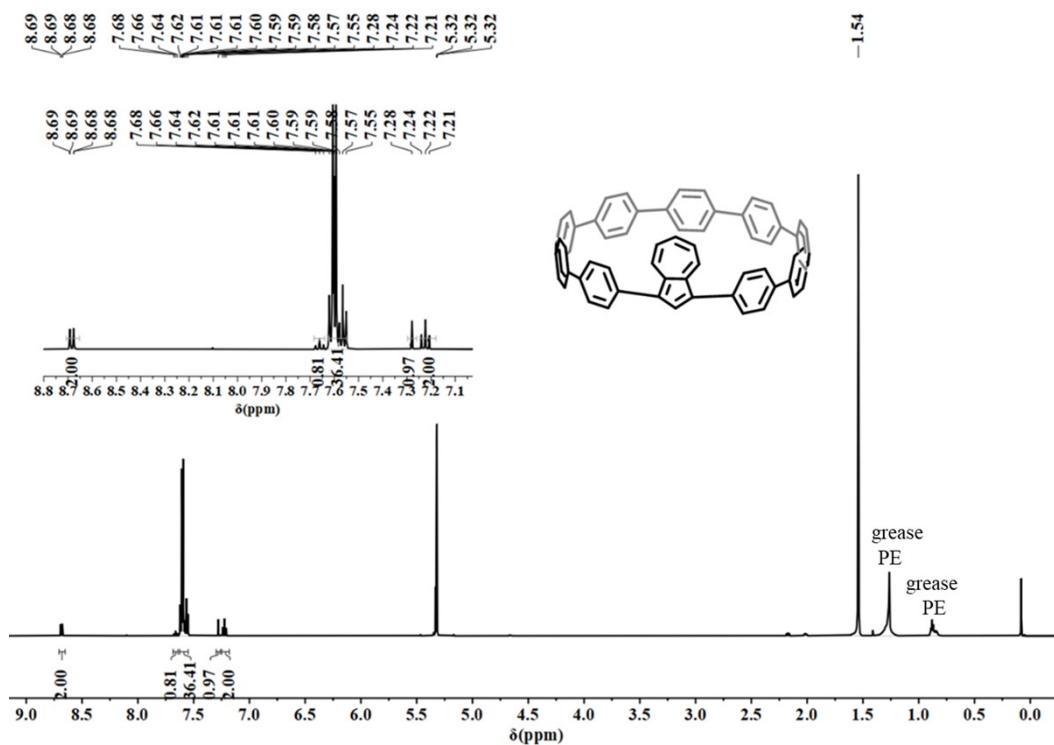

Figure S1.  $^1\text{H-NMR}$  spectrum of compound 1,3-Az[9]CPP in  $\text{CD}_2\text{Cl}_2$  (600 MHz, 298 K)

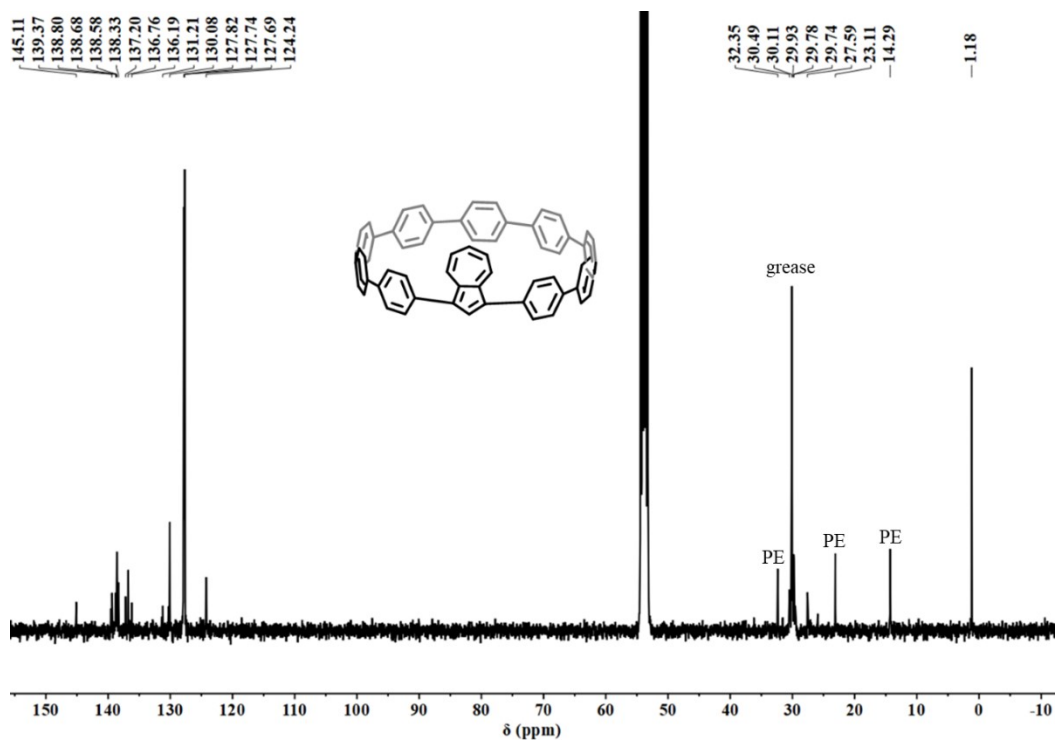

Figure S2.  $^{13}\text{C-NMR}$  spectrum of compound 1,3-Az[9]CPP in  $\text{CD}_2\text{Cl}_2$  (100 MHz, 298 K)

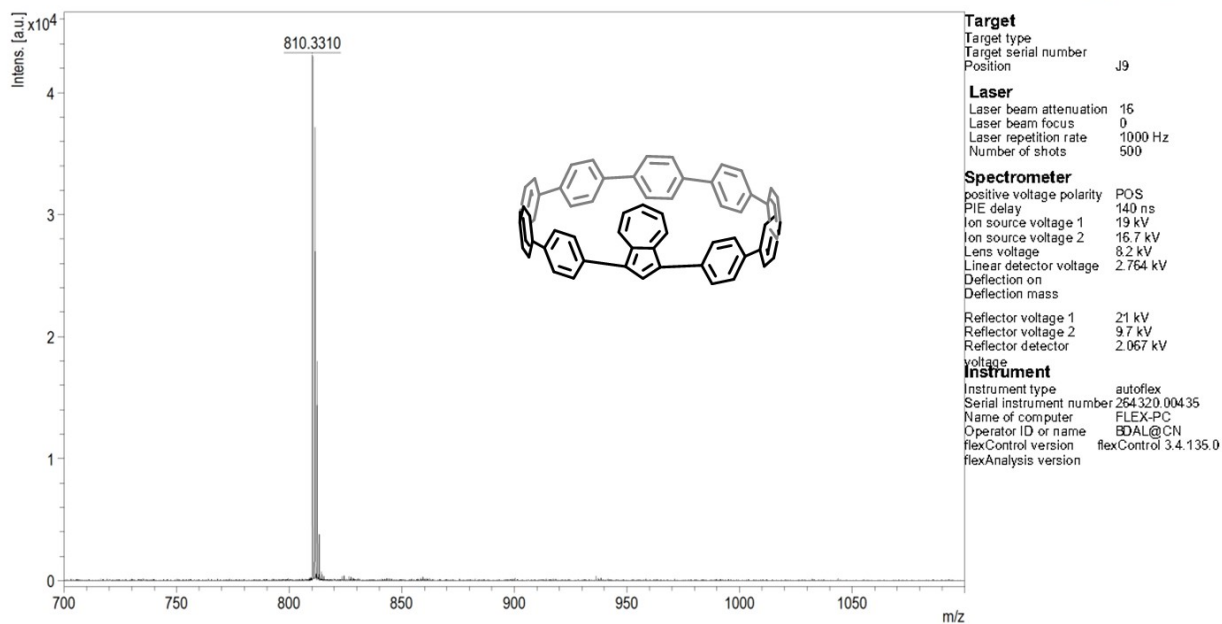

Figure S3. High-resolution mass spectrum (MALDI-TOF) of 1,3-Az[9]CPP

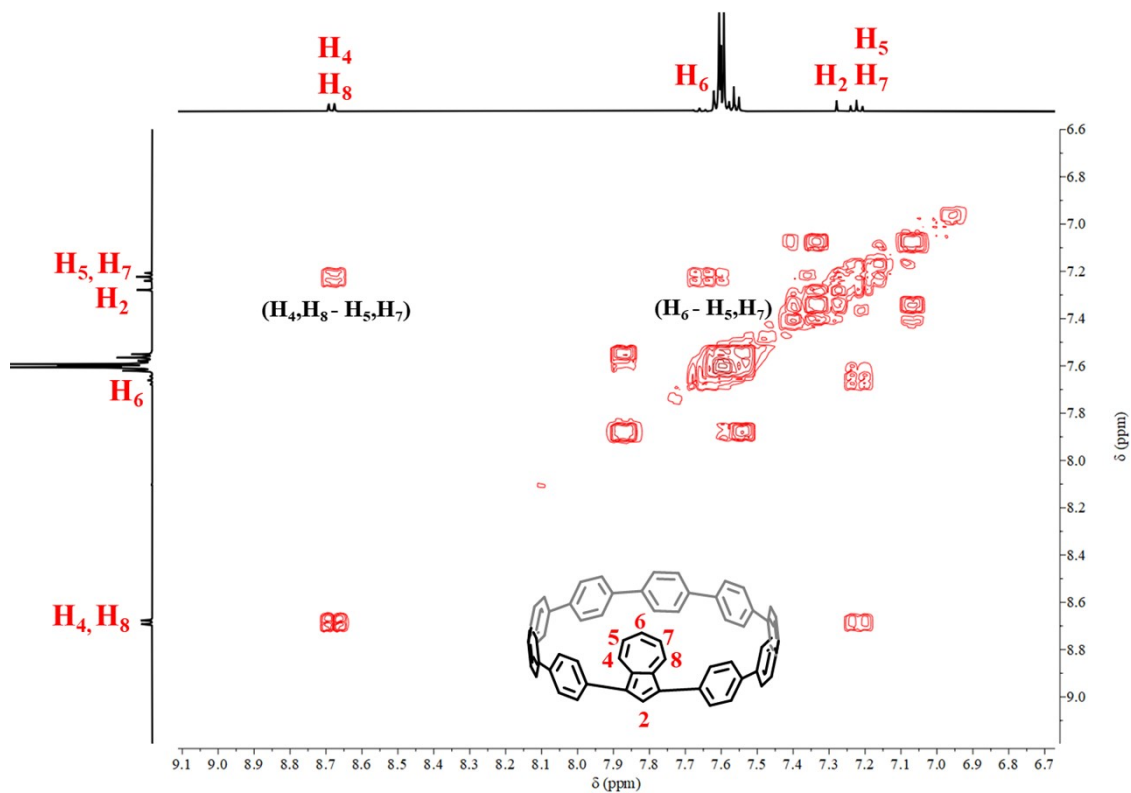

Figure S4. Partial  $^1\text{H}$ - $^1\text{H}$  COSY spectrum of compound 1,3-Az[9]CPP in  $\text{CD}_2\text{Cl}_2$  (400 MHz, 298 K)

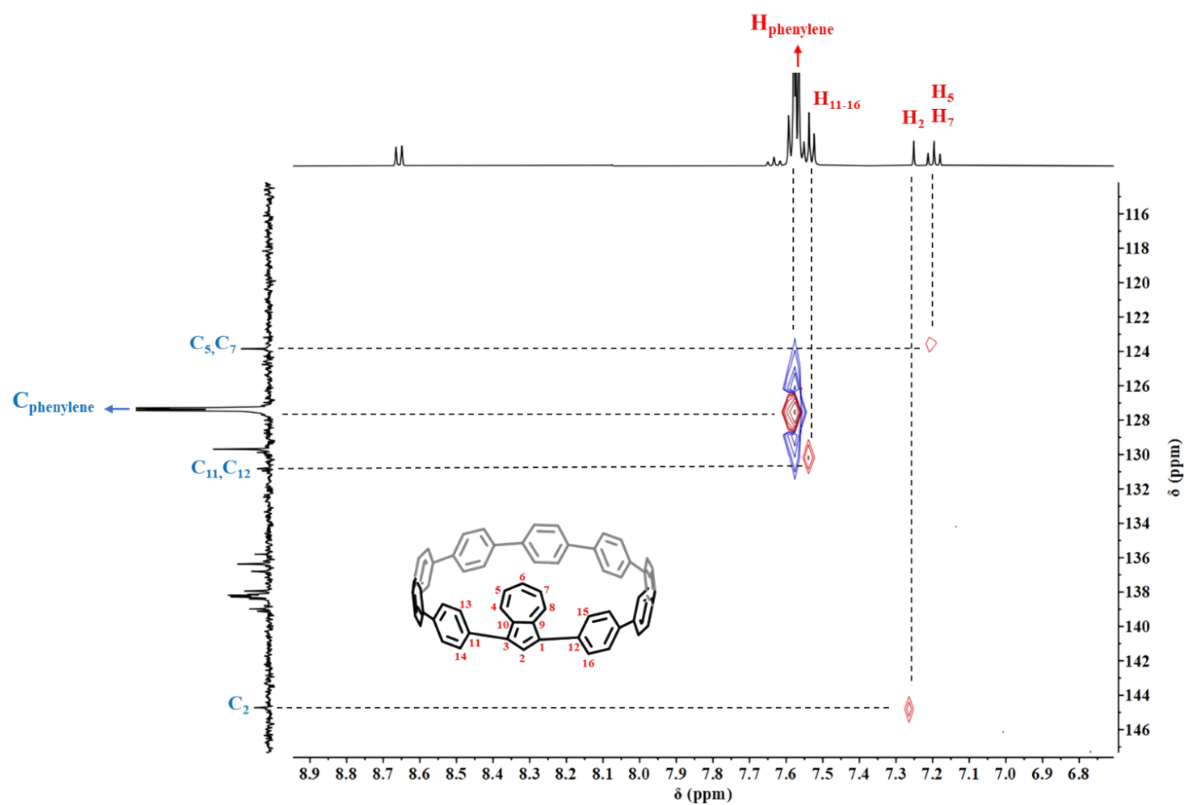

Figure S5. Partial  $^1\text{H}$ - $^{13}\text{C}$  HSQC spectrum of compound **1,3-Az[9]CPP** in  $\text{CD}_2\text{Cl}_2$  (600 MHz, 298 K)

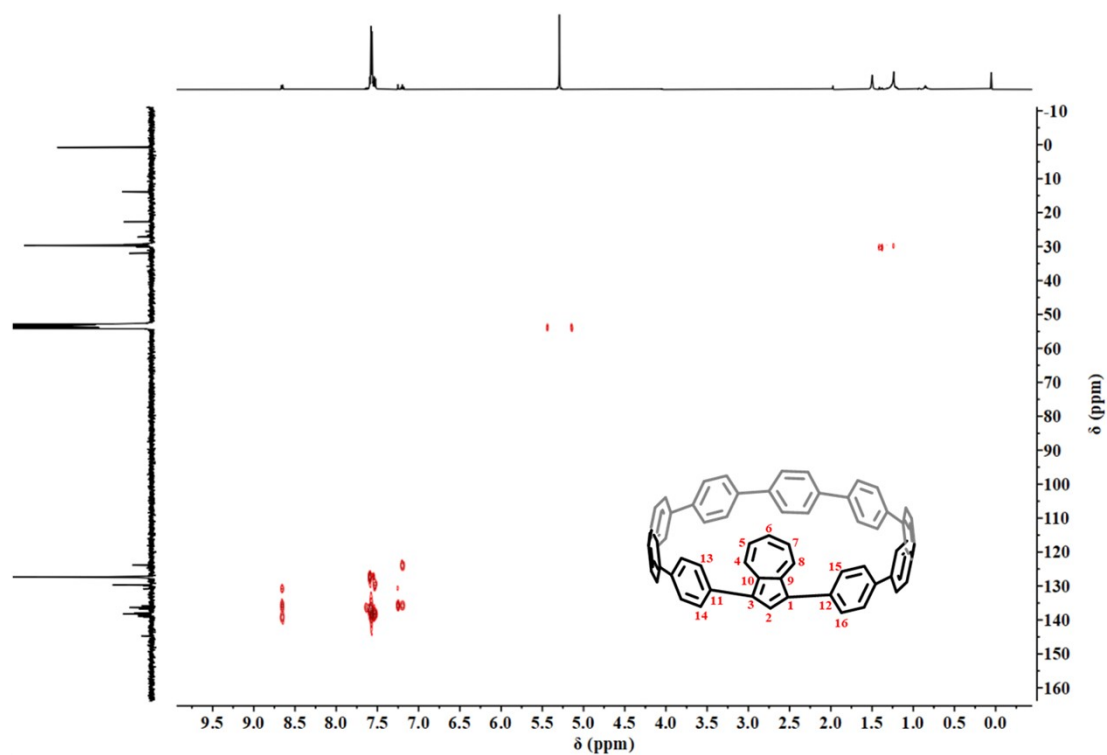

Figure S6. Partial  $^1\text{H}$ - $^{13}\text{C}$  HMBC spectrum of compound **1,3-Az[9]CPP** in  $\text{CD}_2\text{Cl}_2$  (600 MHz, 298 K)

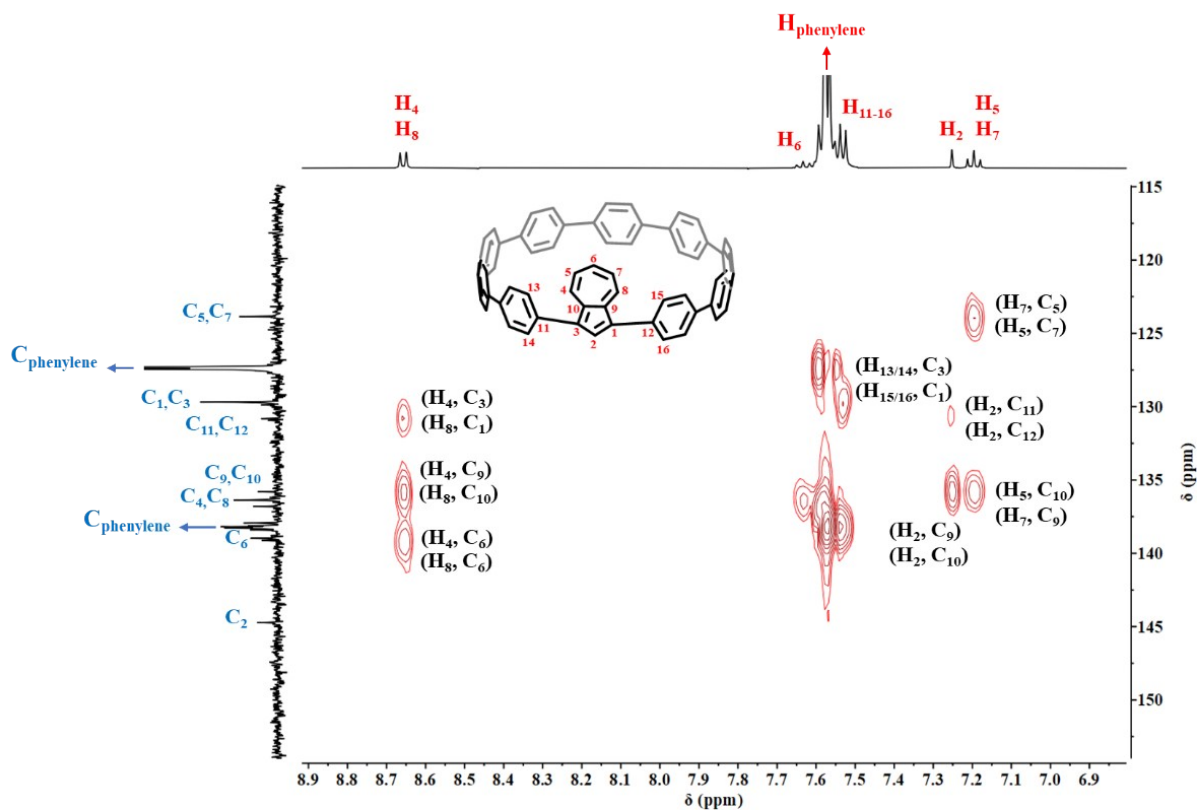

Figure S7. Partial  $^1\text{H}$ - $^{13}\text{C}$  HMBC spectrum of compound **1,3-Az[9]CPP** in  $\text{CD}_2\text{Cl}_2$  (600 MHz, 298 K)

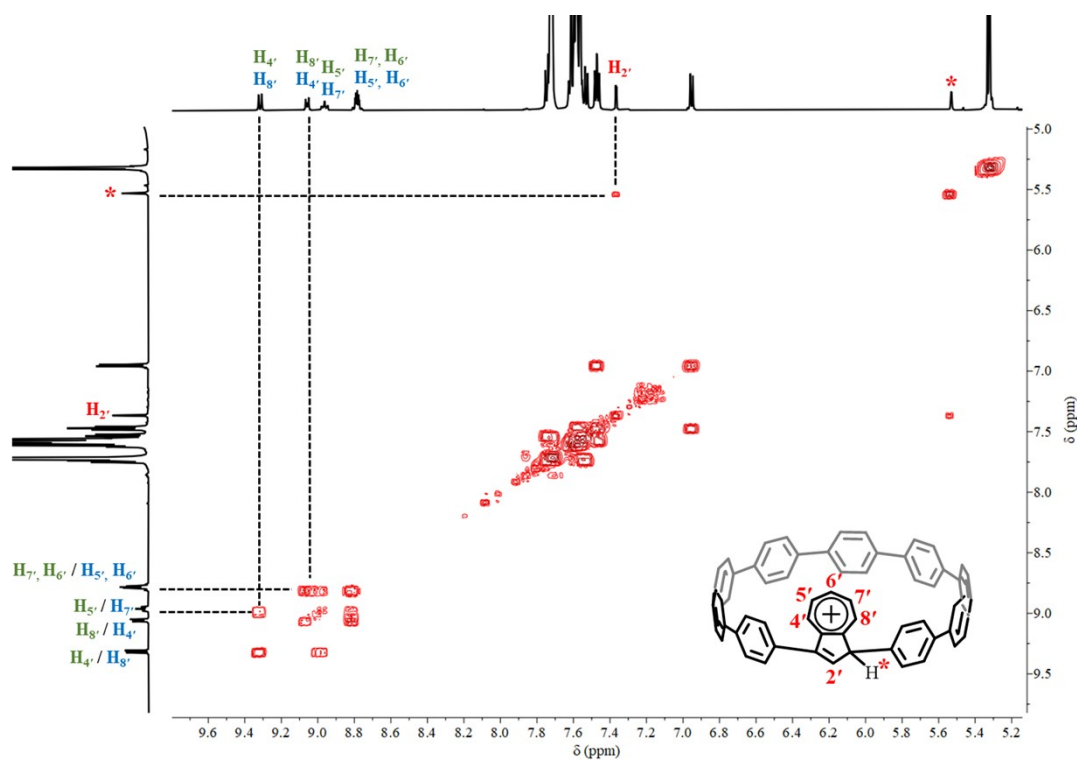

Figure S8. Partial  $^1\text{H}$ - $^1\text{H}$  COSY spectrum of compound **1,3-Az[9]CPP-H<sup>+</sup>** in  $\text{CD}_2\text{Cl}_2$  (400 MHz, 298 K)

## 4. X-ray Crystallography

Crystals suitable for X-ray analysis were obtained by slow diffusion of acetonitrile into 1,1,2,2-tetrachloroethane solution of **1,3-Az[9]CPP** and chlorobenzene solution of **C<sub>60</sub>@1,3-Az[9]CPP**, respectively. Single crystal X-ray diffraction data were collected on a Super Nova, Dual, Cu at zero, AtlasS2 diffractometer. The crystal was kept at 100.00(10) K during data collection. Using Olex2<sup>7</sup>, the structure was solved with the ShelXT<sup>8</sup> structure solution program using Direct Methods and refined with the ShelXL refinement package using Least Squares minimization. The disordered solvent molecules were removed with the SQUEEZE routine in PLATON<sup>9</sup> and the solvent-free model was employed for the final refinement. All non-hydrogen atoms were refined anisotropically. All hydrogen atoms were positioned by geometric idealization. Details of the crystal data and a summary of the intensity data collection parameters for **1,3-Az[9]CPP** and **C<sub>60</sub>@1,3-Az[9]CPP** are listed in **Table S1-S2**. Crystallographic data were deposited at the Cambridge Crystallographic Data Center (CCDC 2177150 for **1,3-Az[9]CPP**, 2177151 for **C<sub>60</sub>@1,3-Az[9]CPP**). The data can be obtained free of charge from The Cambridge Crystallographic Data Centre via [www.ccdc.cam.ac.uk/structures](http://www.ccdc.cam.ac.uk/structures).

Crystal Structure Data of compound **1,3-Az[9]CPP** (CCDC number: 2177150).

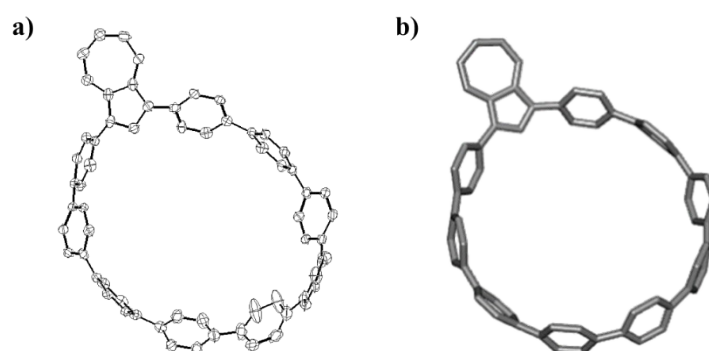

**Figure S9.** Crystal structure of **1,3-Az[9]CPP** was obtained by slow diffusion of acetonitrile into 1,1,2,2-tetrachloroethane solution. The thermal ellipsoids are set at a 50 % probability level. Hydrogen atoms are omitted for clarity.

**Table S1.** Crystal data and structure refinement for compound **1,3-Az[9]CPP**.

| Identification code                | <b>1,3-Az[9]CPP</b>                                           |
|------------------------------------|---------------------------------------------------------------|
| Empirical formula                  | C <sub>64</sub> H <sub>42</sub>                               |
| Formula weight                     | 810.97                                                        |
| Temperature/K                      | 100.00(10)                                                    |
| Crystal system                     | monoclinic                                                    |
| Space group                        | P2 <sub>1</sub>                                               |
| a/Å                                | 15.6621(4)                                                    |
| b/Å                                | 8.4566(2)                                                     |
| c/Å                                | 20.4458(5)                                                    |
| α/°                                | 90                                                            |
| β/°                                | 108.855(3)                                                    |
| γ/°                                | 90                                                            |
| Volume/Å <sup>3</sup>              | 2562.69(12)                                                   |
| Z                                  | 2                                                             |
| ρ <sub>calc</sub> /cm <sup>3</sup> | 1.051                                                         |
| μ/mm <sup>-1</sup>                 | 0.451                                                         |
| F(000)                             | 852.0                                                         |
| Crystal size/mm <sup>3</sup>       | 0.1 × 0.08 × 0.05                                             |
| Radiation                          | Cu Kα (λ = 1.54184)                                           |
| 2θ range for data collection/°     | 8.608 to 134.128                                              |
| Index ranges                       | -18 ≤ h ≤ 18, -9 ≤ k ≤ 10, -24 ≤ l ≤ 23                       |
| Reflections collected              | 18008                                                         |
| Independent reflections            | 7607 [R <sub>int</sub> = 0.0349, R <sub>sigma</sub> = 0.0411] |
| Data/restraints/parameters         | 7607/1/577                                                    |
| Goodness-of-fit on F <sup>2</sup>  | 1.051                                                         |
| Final R indexes [I >= 2σ (I)]      | R <sub>1</sub> = 0.0554, wR <sub>2</sub> = 0.1557             |

Final R indexes [all data]  
 Largest diff. peak/hole / e Å<sup>-3</sup>  
 Flack parameter

R<sub>1</sub> = 0.0577, wR<sub>2</sub> = 0.1585  
 0.33/-0.23  
 -5.2(2)

Crystal Structure Data of compound C<sub>60</sub>@1,3-Az[9]CPP (CCDC number: 2177151).

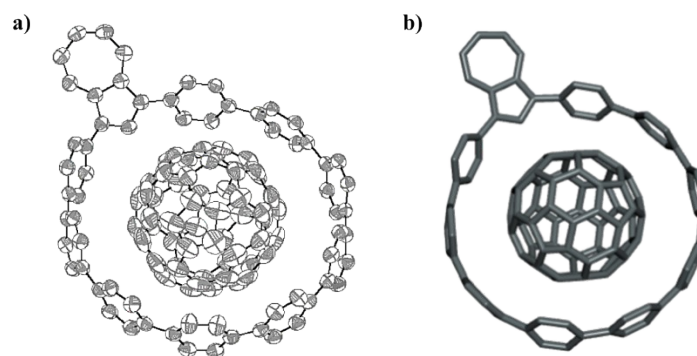

**Figure S10.** Crystal structure of C<sub>60</sub>@1,3-Az[9]CPP was obtained by slow diffusion of acetonitrile into chlorobenzene solution. The thermal ellipsoids are set at a 50 % probability level. Hydrogen atoms are omitted for clarity.

**Table S2.** Crystal data and structure refinement for compound C<sub>60</sub>@1,3-Az[9]CPP.

| Identification code                         | C <sub>60</sub> @1,3-Az[9]CPP                                  |
|---------------------------------------------|----------------------------------------------------------------|
| Empirical formula                           | C <sub>124</sub> H <sub>42</sub>                               |
| Formula weight                              | 1531.57                                                        |
| Temperature/K                               | 173.0                                                          |
| Crystal system                              | monoclinic                                                     |
| Space group                                 | C2/c                                                           |
| a/Å                                         | 61.130(4)                                                      |
| b/Å                                         | 9.9469(6)                                                      |
| c/Å                                         | 31.1453(18)                                                    |
| α/°                                         | 90                                                             |
| β/°                                         | 102.894(2)                                                     |
| γ/°                                         | 90                                                             |
| Volume/Å <sup>3</sup>                       | 18460.4(19)                                                    |
| Z                                           | 4                                                              |
| ρ <sub>calc</sub> /cm <sup>3</sup>          | 1.459                                                          |
| μ/mm <sup>-1</sup>                          | 2.051                                                          |
| F(000)                                      | 8328.0                                                         |
| Crystal size/mm <sup>3</sup>                | 0.04 × 0.03 × 0.02                                             |
| Radiation                                   | CuKα (λ = 1.54178)                                             |
| 2θ range for data collection/°              | 5.822 to 133.374                                               |
| Index ranges                                | -66 ≤ h ≤ 72, -8 ≤ k ≤ 11, -36 ≤ l ≤ 37                        |
| Reflections collected                       | 82296                                                          |
| Independent reflections                     | 16164 [R <sub>int</sub> = 0.0768, R <sub>sigma</sub> = 0.0709] |
| Data/restraints/parameters                  | 16164/80/1379                                                  |
| Goodness-of-fit on F <sup>2</sup>           | 1.280                                                          |
| Final R indexes [I >= 2σ (I)]               | R <sub>1</sub> = 0.1133, wR <sub>2</sub> = 0.3035              |
| Final R indexes [all data]                  | R <sub>1</sub> = 0.1751, wR <sub>2</sub> = 0.3374              |
| Largest diff. peak/hole / e Å <sup>-3</sup> | 1.55/-0.84                                                     |



## 5. Proton-responsive behavior of 1,3-Az[9]CPP by NMR titration experiment

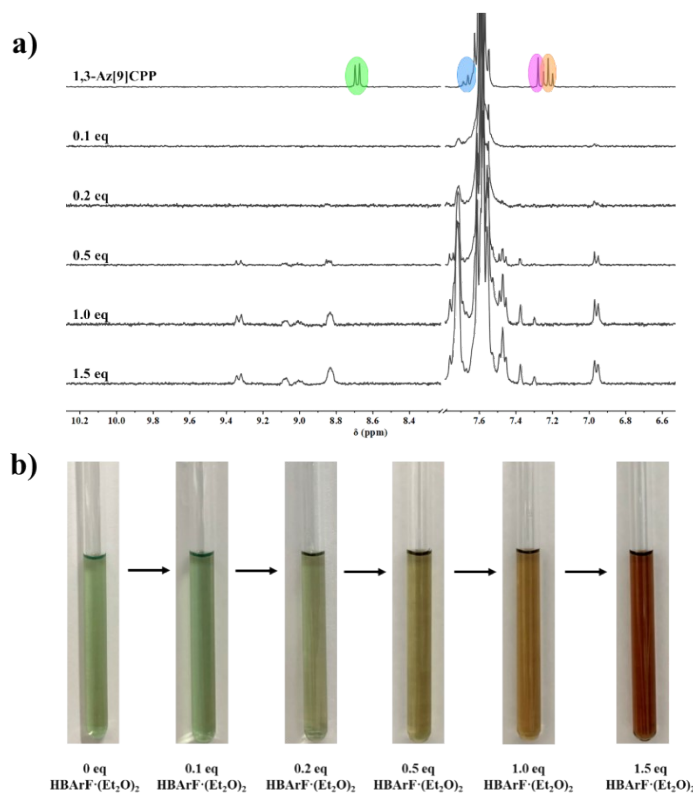

**Figure S11.** a) <sup>1</sup>H-NMR spectra (400 MHz, 298K, CD<sub>2</sub>Cl<sub>2</sub>) during titration of **1,3-Az[9]CPP** (CD<sub>2</sub>Cl<sub>2</sub>, 1 mM) with HBARF·(Et<sub>2</sub>O)<sub>2</sub>, b) solution color changes before and after protonation

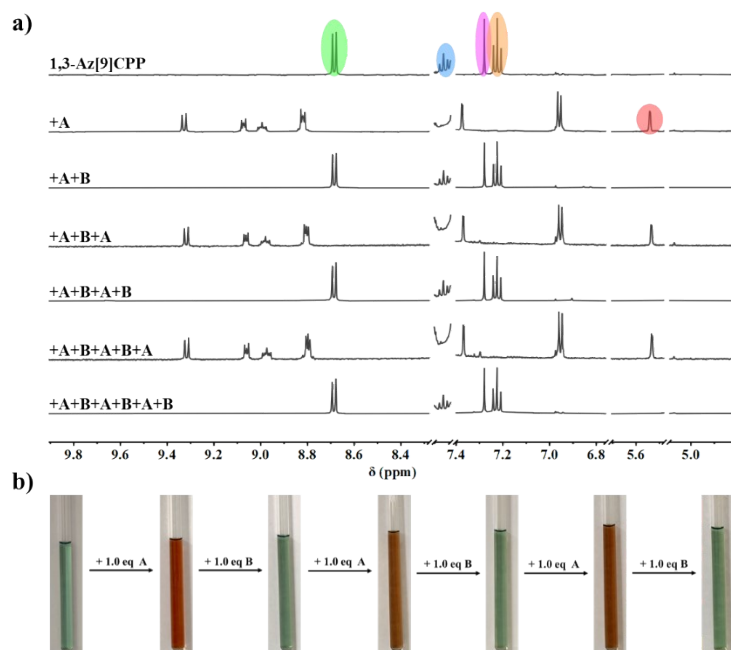

**Figure S12.** a) <sup>1</sup>H-NMR spectra (600 MHz, 298K, CD<sub>2</sub>Cl<sub>2</sub>) of **1,3-Az[9]CPP** (CD<sub>2</sub>Cl<sub>2</sub>, 2 mM) upon addition of HBARF·(Et<sub>2</sub>O)<sub>2</sub> (A, 1.0 eq for each addition) and DBU (B, 1.0 eq for each addition), b) color changes upon protonation/deprotonation

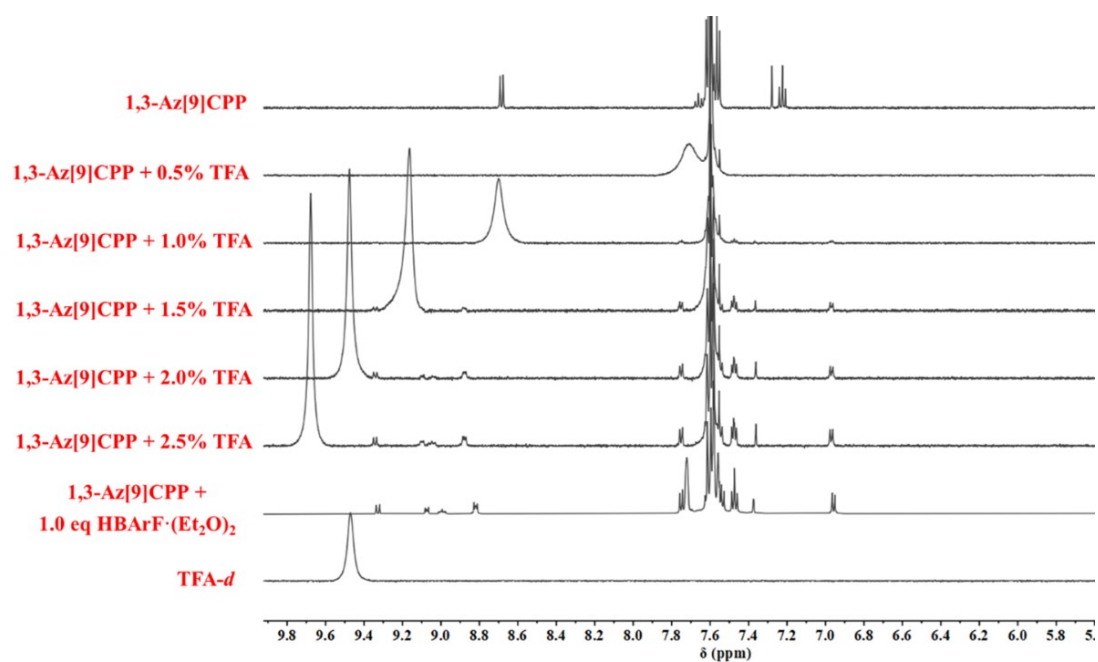

Figure S13.  $^1\text{H-NMR}$  spectra (600 MHz, 298K,  $\text{CD}_2\text{Cl}_2$ ) during titration of **1,3-Az[9]CPP** ( $\text{CD}_2\text{Cl}_2$ , 1 mM) with TFA-*d*.

## 6. Proton-responsive behavior of 1,3-Az[9]CPP by UV-Vis titration experiment

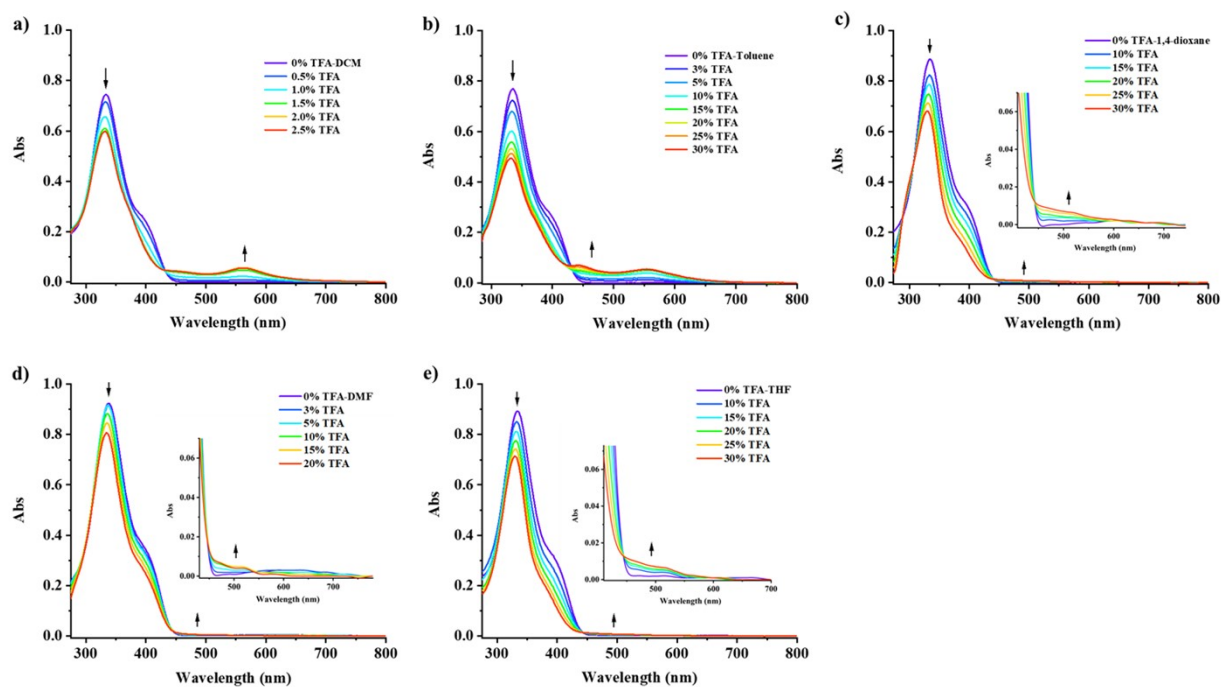

Figure S14. The UV-Vis spectra of **1,3-Az[9]CPP** ( $1.0 \times 10^{-5}$  M) upon addition of TFA in a) DCM, b) toluene, c) 1,4-dioxane, d) DMF and e) THF.

## 7. Fluorescence spectra of 1,3-Az[9]CPP and 1,3-Az[9]CPP-H<sup>+</sup>

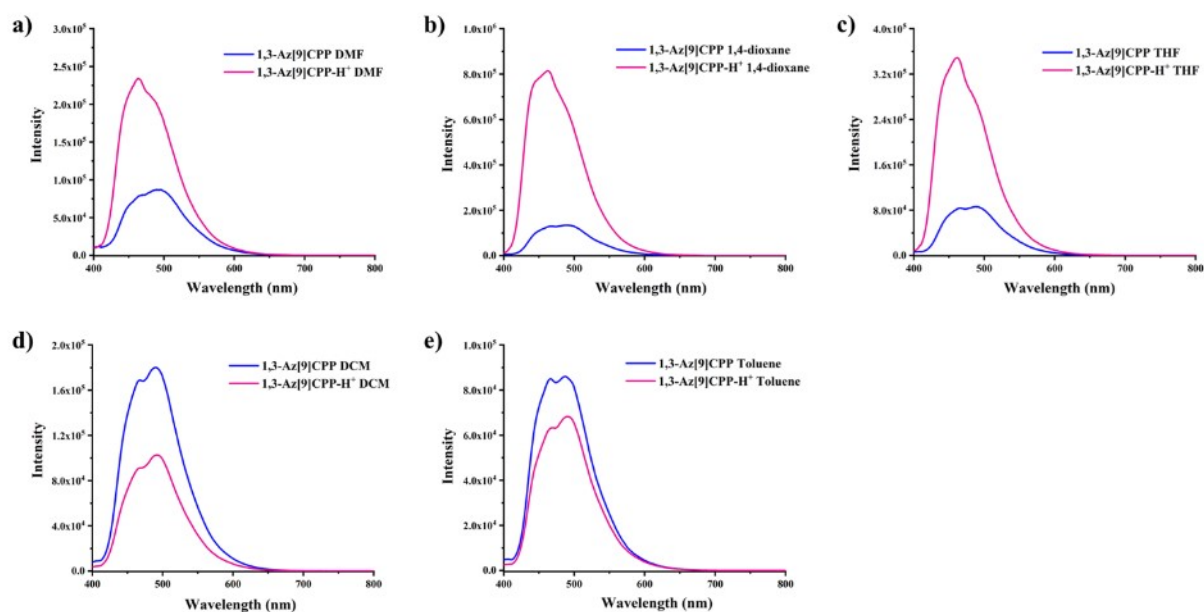

Figure S15. Fluorescence spectra of 1,3-Az[9]CPP and 1,3-Az[9]CPP-H<sup>+</sup> ( $1.0 \times 10^{-5}$  M) in a) DMF, c) 1,4-dioxane, c) THF, d) DCM, e) toluene.

## 8. UV-Vis titration experiments of complexation between 1,3-Az[9]CPP-H<sup>+</sup> with C<sub>70</sub>

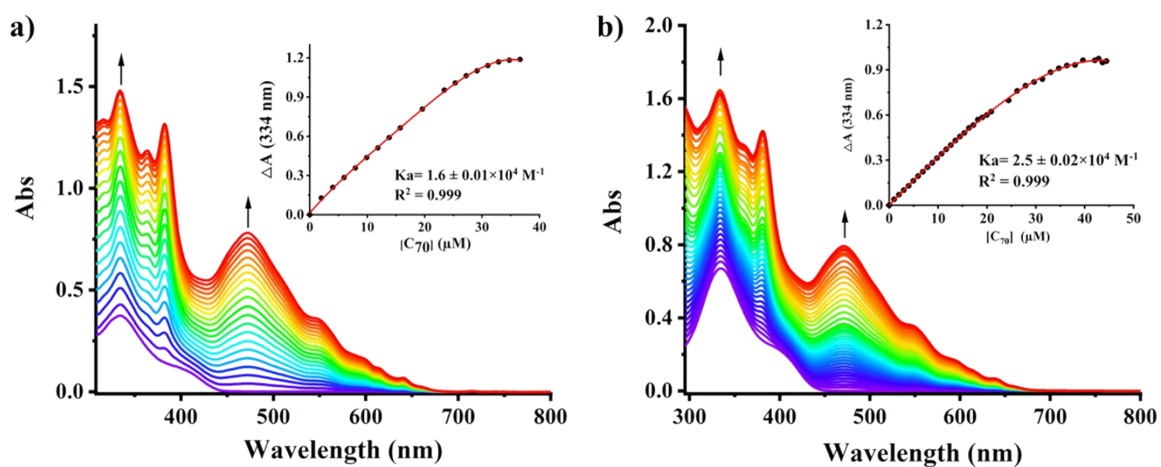

Figure S16. UV-Vis spectra in toluene of a) 1,3-Az[9]CPP ( $1.0 \times 10^{-5}$  M) in the presence of C<sub>70</sub> ( $0-3.66 \times 10^{-5}$  M),  $K_a = 1.6 \times 10^4$  M<sup>-1</sup>, b) 1,3-Az[9]CPP-H<sup>+</sup> ( $1.0 \times 10^{-5}$  M) in the presence of C<sub>70</sub> ( $0-4.44 \times 10^{-5}$  M)  $K_a = 2.5 \times 10^4$  M<sup>-1</sup>.

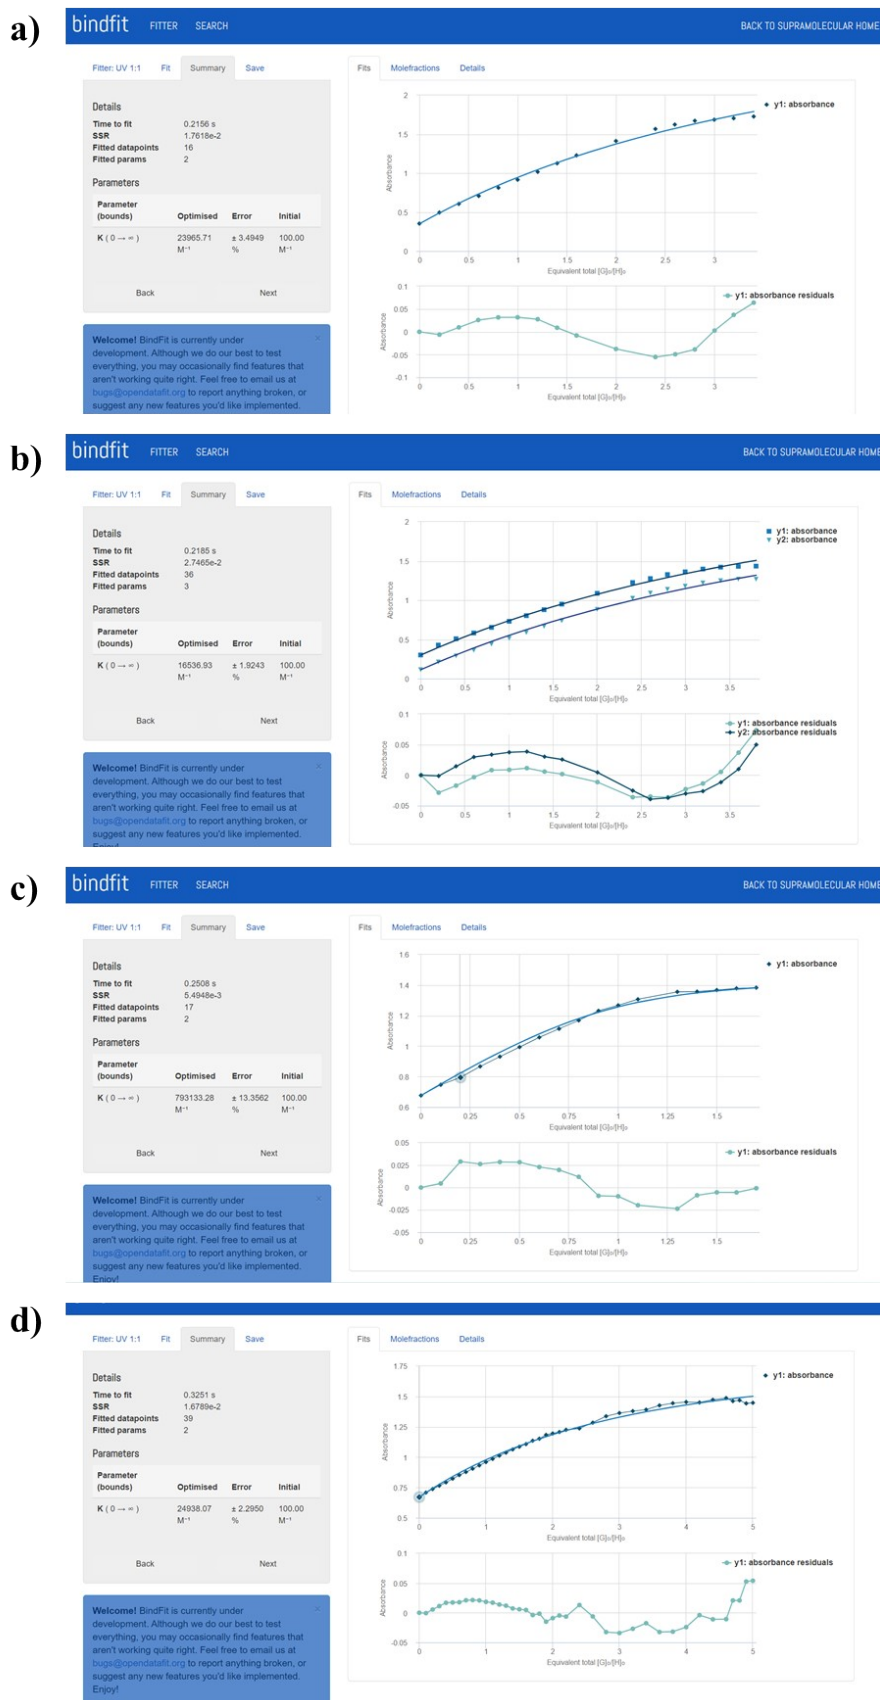

**Figure S17.** Global fitting with the experimental data of a) **1,3-AZ[9]CPP** and  $C_{60}$ , b) **1,3-AZ[9]CPP** and  $C_{70}$ , c) **1,3-AZ[9]CPP-H<sup>+</sup>** and  $C_{60}$ , d) **1,3-AZ[9]CPP-H<sup>+</sup>** and  $C_{70}$ , UV-Vis titration experiments by the bindfit program available from the Internet website <http://supramolecular.org>.<sup>9</sup>

## 9. NMR titration experiments of complexation between 1,3-Az[9]CPP-H<sup>+</sup> with C<sub>60</sub> and C<sub>70</sub>

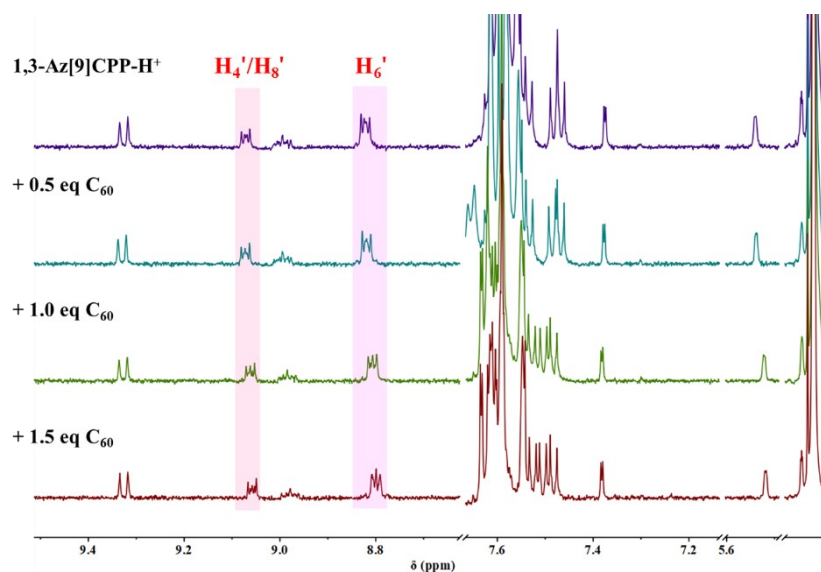

**Figure S18.** <sup>1</sup>H-NMR spectra (600 MHz, 298K, CD<sub>2</sub>Cl<sub>2</sub>) during titration of **1,3-Az[9]CPP** (CD<sub>2</sub>Cl<sub>2</sub>, C<sub>1,3-Az[9]CPP</sub> = 1 mM) with C<sub>60</sub> (CS<sub>2</sub>, C<sub>C60</sub>=0.01 M)

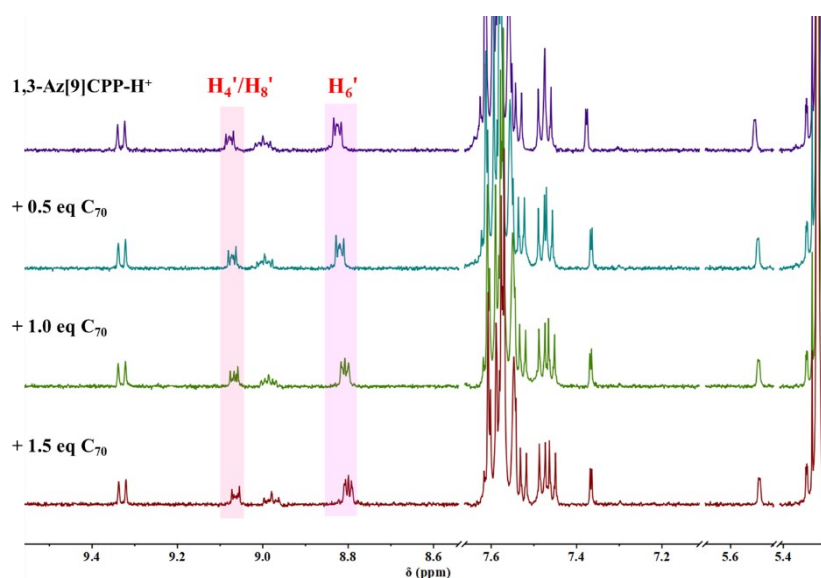

**Figure S19.** <sup>1</sup>H-NMR spectra (600 MHz, 298K, CD<sub>2</sub>Cl<sub>2</sub>) during titration of **1,3-Az[9]CPP** (CD<sub>2</sub>Cl<sub>2</sub>, C<sub>1,3-Az[9]CPP</sub> = 1 mM) with C<sub>70</sub> (CS<sub>2</sub>, C<sub>C70</sub>=0.01 M)

## 10. Theoretical Calculations

All the DFT calculations were performed with Gaussian 16 program<sup>10</sup>. The geometries of ground state of 1,3-Az[9]CPP and 1,3-Az[9]CPP-H<sup>+</sup> were optimized at the B3LYP/6-31g(d, p) level with D3BJ empirical dispersion correction. Time-dependent (TD)-DFT calculations were carried out for the excited states at ωB97XD/ 6-31g(d,p) level of theory. All the calculations were performed with the correction of the polarizable continuum model (PCM) to consider the solvent effect of dichloromethane. Harmonic vibration frequency were calculated at the same level to verify these stationary points as local minima (i.e., no imaginary frequency). The UV-Vis absorption spectrums were drawn by the Multiwfn software<sup>11</sup>.

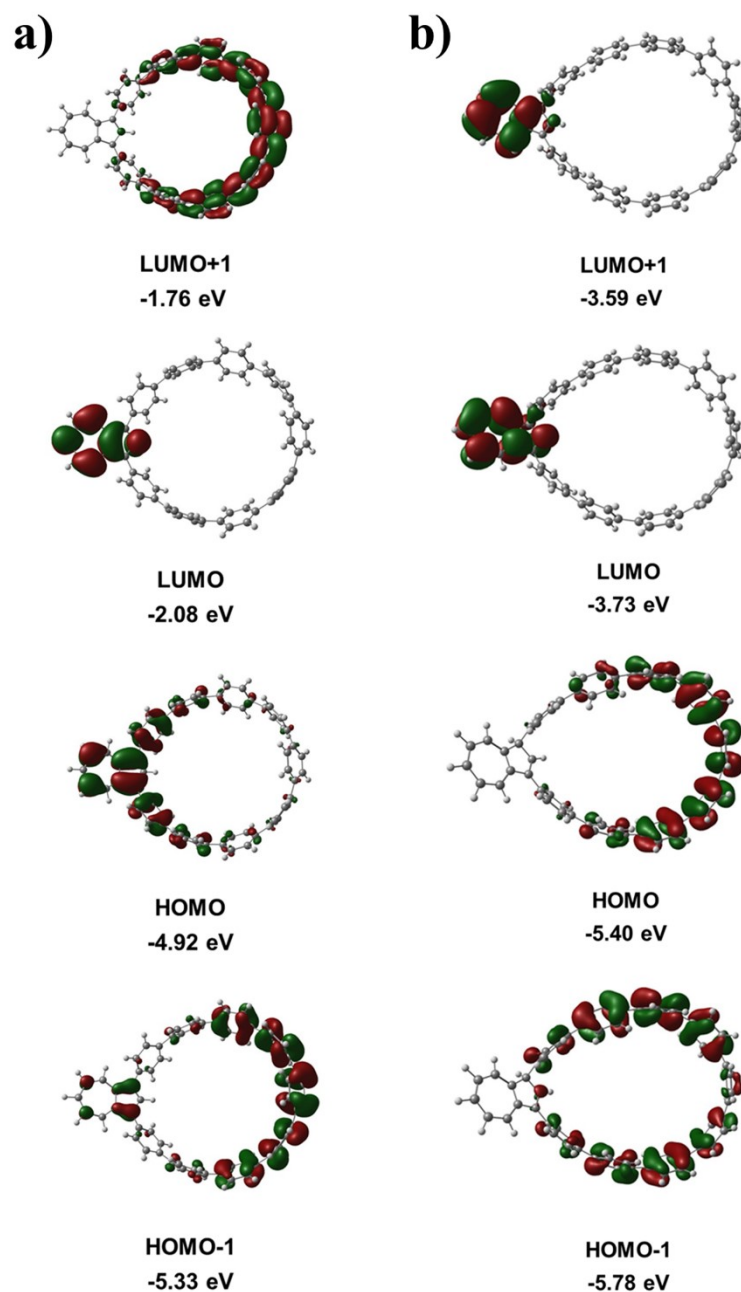

**Figure S20.** Frontier molecular orbitals (FMOs) of a) 1,3-Az[9]CPP and b) 1,3-Az[9]CPP-H<sup>+</sup>.

**Table S3.** The electrochemical data of 1,3-Az[9]CPP and 1,3-Az[9]CPP-H<sup>+</sup>

|                             | $E_{\text{HOMO}}^{\text{a}}$ (eV) | $E_{\text{LUMO}}^{\text{a}}$ (eV) | $E_{\text{HOMO-LUMO}}^{\text{a}}$ (eV) |
|-----------------------------|-----------------------------------|-----------------------------------|----------------------------------------|
| 1,3-Az[9]CPP                | -4.92                             | -2.08                             | 2.84                                   |
| 1,3-Az[9]CPP-H <sup>+</sup> | -5.40                             | -3.73                             | 1.67                                   |

<sup>a</sup> Estimated from DFT calculations at the B3LYP-D3BJ/6-31g(d, p) level

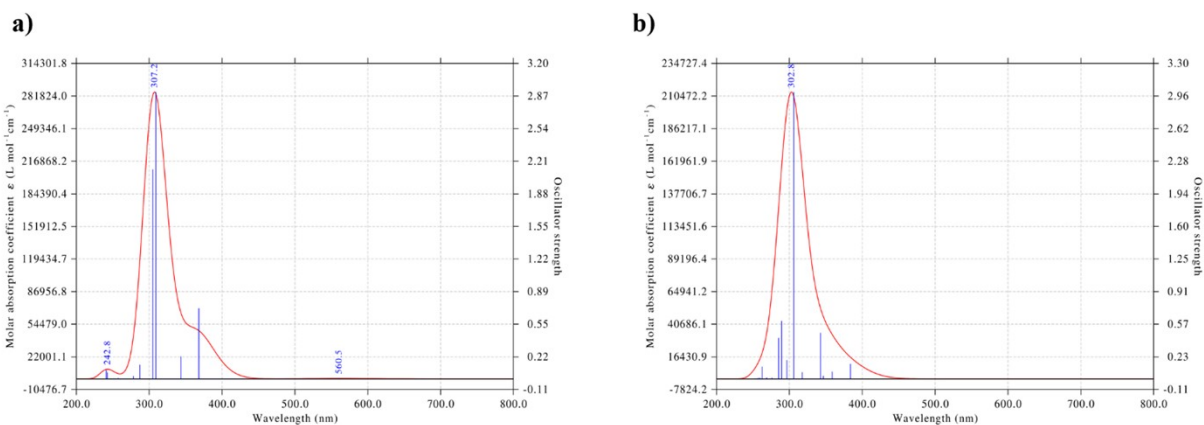

**Figure S21.** TD-DFT-calculated UV-Vis absorption spectra of (a) **1,3-Az[9]CPP**, (b) **1,3-Az[9]CPP-H<sup>+</sup>** along with the oscillator strengths at the  $\omega$ B97XD/ 6-31g(d, p) level.

**Table S4.** Major electronic transitions of **1,3-Az[9]CPP** calculated by TD-DFT method at the  $\omega$ B97XD/ 6-31g(d,p) level.

| Excited state | Energy (eV) | Wavelength (nm) | Osc. Strength (f) | Major contributions |
|---------------|-------------|-----------------|-------------------|---------------------|
| <b>1</b>      | 2.2118      | 560.56          | 0.0089            | H → L 83.5%         |
|               |             |                 |                   | H-1 → L 7.9%        |
|               |             |                 |                   | H-4 → L 5.1%        |
| <b>2</b>      | 3.3671      | 368.22          | 0.7165            | H → L+2 65.7%       |
|               |             |                 |                   | H → L+3 9.4%        |
|               |             |                 |                   | H-3 → L 6.7%        |
| <b>3</b>      | 3.6084      | 343.60          | 0.2296            | H-1 → L+1 47.5%     |
|               |             |                 |                   | H → L+1 15.8%       |
|               |             |                 |                   | H-2 → L+2 9.4%      |
| <b>4</b>      | 4.0119      | 309.04          | 2.9106            | H-2 → L+3 7.7%      |
|               |             |                 |                   | H-2 → L+1 25.2%     |
|               |             |                 |                   | H-3 → L 9.7%        |
|               |             |                 |                   | H-1 → L+3 9.7%      |
|               |             |                 |                   | H → L+3 9.0%        |
| <b>5</b>      | 4.063       | 305.15          | 2.1264            | H → L+2 5.8%        |
|               |             |                 |                   | H-1 → L+2 5.8%      |
|               |             |                 |                   | H-5 → L 5.3%        |
|               |             |                 |                   | H-2 → L 5.1%        |
|               |             |                 |                   | H → L+4 34.6%       |
| <b>5</b>      | 4.063       | 305.15          | 2.1264            | H-1 → L+1 18.5%     |
|               |             |                 |                   | H-2 → L+2 10.4%     |
|               |             |                 |                   | H-3 → L+2 7.8%      |
|               |             |                 |                   | H → L+1 5.6%        |
| <b>5</b>      | 4.063       | 305.15          | 2.1264            | H-4 → L+1 5.4%      |

|           |        |        |        |                  |
|-----------|--------|--------|--------|------------------|
|           |        |        |        | H-3 → L 25.6%    |
|           |        |        |        | H-2 → L 12.7%    |
|           |        |        |        | H-5 → L 10.0%    |
| <b>6</b>  | 4.316  | 287.27 | 0.1446 | H-2 → L+1 8.7%   |
|           |        |        |        | H-1 → L+3 8.4%   |
|           |        |        |        | H → L+2 7.9%     |
|           |        |        |        | H-1 → L+2 5.9%   |
|           |        |        |        | H-3 → L+1 5.8%   |
|           |        |        |        | H-3 → L+2 27.7%  |
|           |        |        |        | H-5 → L+2 15.3%  |
| <b>7</b>  | 4.4558 | 278.25 | 0.0293 | H-2 → L+2 11.7%  |
|           |        |        |        | H → L+4 8.2%     |
|           |        |        |        | H-3 → L+3 7.7%   |
|           |        |        |        | H-1 → L+5 25.9%  |
|           |        |        |        | H-7 → L+1 15.5%  |
| <b>8</b>  | 4.665  | 265.78 | 0.0025 | H-1 → L+6 13.6%  |
|           |        |        |        | H-2 → L+7 6.0%   |
|           |        |        |        | H-1 → L+4 18.8%  |
|           |        |        |        | H-4 → L+1 17.3%  |
| <b>9</b>  | 4.7204 | 262.66 | 0.0000 | H-2 → L+3 11.9%  |
|           |        |        |        | H → L+8 7.6%     |
|           |        |        |        | H-2 → L+2 5.9%   |
|           |        |        |        | H-1 → L+7 19.0%  |
|           |        |        |        | H-9 → L+1 10.1%  |
| <b>10</b> | 4.7408 | 261.53 | 0.0029 | H-2 → L+5 7.8%   |
|           |        |        |        | H → L+7 6.7%     |
|           |        |        |        | H → L+9 22.1%    |
| <b>11</b> | 4.7775 | 259.52 | 0.0012 | H → L+11 5.9%    |
|           |        |        |        | H → L+13 5.3%    |
|           |        |        |        | H → L+10 22.0%   |
|           |        |        |        | H-2 → L+9 9.5%   |
| <b>12</b> | 4.8055 | 258.00 | 0.0035 | H-8 → L+2 7.0%   |
|           |        |        |        | H → L+12 6.6%    |
|           |        |        |        | H → L+8 6.2%     |
|           |        |        |        | H-2 → L+4 9.6%   |
| <b>13</b> | 4.8164 | 257.42 | 0.0083 | H → L+9 5.7%     |
|           |        |        |        | H-2 → L 5.1%     |
|           |        |        |        | H-1 → L+11 11.2% |
|           |        |        |        | H → L+11 7.1%    |
| <b>14</b> | 4.8789 | 254.12 | 0.0036 | H-11 → L+1 7.1%  |
|           |        |        |        | H-13 → L+1 6.6%  |
|           |        |        |        | H → L+12 12.6%   |
| <b>15</b> | 4.9344 | 251.26 | 0.0043 | H-14 → L+1 5.8%  |
|           |        |        |        | H-11 → L+2 5.3%  |



|           |        |        |        |            |       |
|-----------|--------|--------|--------|------------|-------|
| <b>16</b> | 4.9676 | 249.59 | 0.0020 | H → L+13   | 14.3% |
|           |        |        |        | H-2 → L+12 | 7.9%  |
|           |        |        |        | H-13 → L+1 | 7.4%  |
|           |        |        |        | H-12 → L+2 | 5.8%  |
|           |        |        |        | H-11 → L+4 | 5.7%  |
| <b>17</b> | 5.0012 | 247.91 | 0.0031 | H-14 → L+1 | 16.0% |
|           |        |        |        | H-1 → L+14 | 9.3%  |
|           |        |        |        | H-2 → L+13 | 7.0%  |
|           |        |        |        | H-13 → L+3 | 5.2%  |
| <b>18</b> | 5.0223 | 246.87 | 0.0046 | H-15 → L+1 | 24.5% |
|           |        |        |        | H-1 → L+15 | 15.5% |
|           |        |        |        | H-14 → L+3 | 7.9%  |
| <b>19</b> | 5.1114 | 242.56 | 0.0648 | H-5 → L    | 32.6% |
|           |        |        |        | H-2 → L    | 29.7% |
|           |        |        |        | H-16 → L   | 12.6% |
| <b>20</b> | 5.1420 | 241.12 | 0.0902 | H-4 → L    | 26.7% |
|           |        |        |        | H-1 → L    | 12.5% |
|           |        |        |        | H → L      | 8.1%  |
|           |        |        |        | H-6 → L    | 7.6%  |
|           |        |        |        | H-17 → L   | 6.4%  |

**Table S5.** Major electronic transitions of **1,3-Az[9]CPP-H<sup>+</sup>** calculated by TD-DFT method at the  $\omega$ B97XD/6-31g(d, p) level.

| Excited state | Energy (eV) | Wavelength (nm) | Osc. Strength (f) | Major contributions |       |
|---------------|-------------|-----------------|-------------------|---------------------|-------|
| <b>1</b>      | 3.2298      | 383.88          | 0.1585            | H-3 → L             | 34.8% |
|               |             |                 |                   | H-1 → L             | 30.0% |
|               |             |                 |                   | H-12 → L            | 14.8% |
|               |             |                 |                   | H-2 → L             | 6.4%  |
| <b>2</b>      | 3.456       | 358.75          | 0.0768            | H-3 → L+1           | 30.2% |
|               |             |                 |                   | H-1 → L+1           | 24.4% |
|               |             |                 |                   | H-12 → L+1          | 15.5% |
|               |             |                 |                   | H-2 → L+1           | 10.4% |
| <b>3</b>      | 3.5773      | 346.59          | 0.0330            | H-2 → L             | 36.2% |
|               |             |                 |                   | H → L               | 24.3% |
|               |             |                 |                   | H-4 → L             | 8.4%  |
|               |             |                 |                   | H → L+2             | 5.4%  |
| <b>4</b>      | 3.6180      | 342.69          | 0.4819            | H → L+2             | 52.9% |
|               |             |                 |                   | H-1 → L+3           | 6.6%  |
|               |             |                 |                   | H → L+3             | 5.8%  |
| <b>5</b>      | 3.9026      | 317.7           | 0.0707            | H-2 → L+1           | 33.1% |
|               |             |                 |                   | H → L+1             | 27.5% |
|               |             |                 |                   | H-1 → L+1           | 9.5%  |
|               |             |                 |                   | H-4 → L+1           | 7.7%  |

|           |        |        |        |                                                                                                                                     |
|-----------|--------|--------|--------|-------------------------------------------------------------------------------------------------------------------------------------|
|           |        |        |        | H-3 → L+1 6.5%                                                                                                                      |
| <b>6</b>  | 4.0536 | 305.86 | 3.0016 | H-1 → L+2 28.0%<br>H → L+3 22.9%<br>H → L+5 8.5%<br>H-1 → L+3 7.6%<br>H-2 → L+3 6.9%                                                |
| <b>7</b>  | 4.1794 | 296.66 | 0.1972 | H → L 23.1%<br>H-1 → L 17.5%<br>H-12 → L 10.0%<br>H-15 → L 8.5%<br>H-1 → L+3 5.3%                                                   |
| <b>8</b>  | 4.2848 | 289.36 | 0.6079 | H → L 32.8%<br>H-2 → L+2 12.4%<br>H-1 → L+3 11.3%<br>H → L+4 8.5%<br>H-2 → L 7.5%                                                   |
| <b>9</b>  | 4.3464 | 285.26 | 0.4301 | H-1 → L 14.3%<br>H → L 13.8%<br>H-1 → L+3 10.0%<br>H-2 → L+2 9.5%<br>H-12 → L 8.5%<br>H → L+4 6.5%<br>H-16 → L 6.0%<br>H-2 → L 5.4% |
| <b>10</b> | 4.4364 | 279.47 | 0.0006 | H → L+1 37.7%<br>H-1 → L+1 21.4%<br>H-15 → L+1 8.5%<br>H-12 → L+1 6.7%                                                              |
| <b>11</b> | 4.4886 | 276.22 | 0.0119 | H-13 → L 84.9%                                                                                                                      |
| <b>12</b> | 4.6119 | 268.84 | 0.0151 | H → L+8 22.1%<br>H → L+1 9.2%<br>H-5 → L+2 8.5%<br>H-2 → L+1 5.5%                                                                   |
| <b>13</b> | 4.6131 | 268.77 | 0.0072 | H → L+1 19.3%<br>H-2 → L+1 11.5%<br>H → L+8 11.0%<br>H-1 → L+1 9.2%<br>H-12 → L+1 6.8%<br>H-16 → L+1 5.8%                           |
| <b>14</b> | 4.6312 | 267.72 | 0.0009 | H-14 → L 89.8%                                                                                                                      |
| <b>15</b> | 4.7228 | 262.52 | 0.1287 | H-2 → L+3 18.1%<br>H-1 → L+4 16.9%                                                                                                  |

|           |        |        |        |                  |
|-----------|--------|--------|--------|------------------|
|           |        |        |        | H → L+5 13.3%    |
|           |        |        |        | H-3 → L+2 12.8%  |
|           |        |        |        | H → L+9 18.4%    |
|           |        |        |        | H-6 → L+3 6.5%   |
| <b>16</b> | 4.7683 | 260.02 | 0.0099 | H-1 → L+9 5.8%   |
|           |        |        |        | H-6 → L+2 5.5%   |
|           |        |        |        | H-1 → L 22.3%    |
|           |        |        |        | H-3 → L 21.7%    |
| <b>17</b> | 4.7988 | 258.37 | 0.0098 | H-13 → L+1 12.6% |
|           |        |        |        | H-17 → L 6.5%    |
|           |        |        |        | H-21 → L+1 6.1%  |
|           |        |        |        | H-15 → L 5.5%    |
| <b>18</b> | 4.8322 | 256.58 | 0.0061 | H-13 → L+1 72.4% |
|           |        |        |        | H-7 → L+2 14.5%  |
| <b>19</b> | 4.8536 | 255.45 | 0.0035 | H → L+11 10.0%   |
|           |        |        |        | H → L+14 9.7%    |
|           |        |        |        | H-1 → L+9 5.4%   |
| <b>20</b> | 4.8955 | 253.26 | 0.0047 | H-2 → L+6 12.2%  |
|           |        |        |        | H-9 → L+2 8.8%   |
|           |        |        |        | H-1 → L+6 8.1%   |

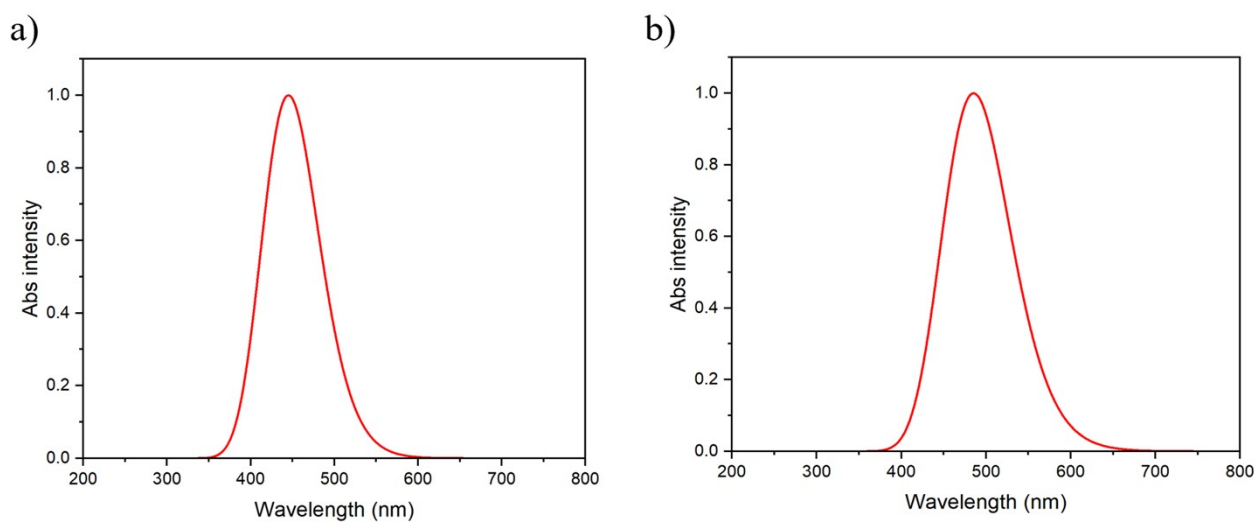

**Figure S22.** a) The  $S_2 \rightarrow S_0$  fluorescence of **1,3-Az[9]CPP**, b) the  $S_1 \rightarrow S_0$  fluorescence of **1,3-Az[9]CPP-H<sup>+</sup>** calculated by TD-DFT method at the  $\omega$ B97XD/ 6-31g(d, p) level.

**Table S6.** TD-DFT-calculated FMOs and electronic transitions of **1,3-Az[9]CPP** and **1,3-Az[9]CPP-H<sup>+</sup>**.

| Excited State<br>( $S_n \rightarrow S_0$ ) | 1,3-Az[9]CPP                                                                       |                                                               | 1,3-Az[9]CPP-H <sup>+</sup>                                                          |                                                                                       |                                                                                |
|--------------------------------------------|------------------------------------------------------------------------------------|---------------------------------------------------------------|--------------------------------------------------------------------------------------|---------------------------------------------------------------------------------------|--------------------------------------------------------------------------------|
| $S_1$                                      | 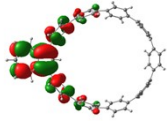  | 1.5533 eV<br>f = 0.0043<br>798 nm<br>H→L 92.8%                |    |    | 2.5447 eV<br>f = 0.3737<br>485 nm<br>H-1→L 42.8%<br>H-3→L 39.5%<br>H-10→L 5.6% |
|                                            | HOMO                                                                               |                                                               | HOMO-10                                                                              | HOMO-3                                                                                |                                                                                |
|                                            |   | LUMO                                                          |    |    |                                                                                |
|                                            | LUMO                                                                               | HOMO-1                                                        | LUMO                                                                                 |                                                                                       |                                                                                |
| $S_2$                                      |   | 2.7853 eV<br>f = 1.1896<br>445 nm<br>H→L 65.9%<br>H-1→L 22.0% |    |    | 3.0945 eV<br>f = 0.0225<br>401 nm<br>H-2→L 43.0%<br>H→L 28.5%<br>H-4→L 16.5%   |
|                                            | HOMO-1                                                                             |                                                               | HOMO-4                                                                               | HOMO-2                                                                                |                                                                                |
|                                            |  | HOMO                                                          |  |  |                                                                                |
|                                            | LUMO                                                                               | LUMO                                                          | HOMO                                                                                 | LUMO                                                                                  |                                                                                |

### Cartesian coordinates

#### Optimized $S_0$ geometry of 1,3-Az[9]CPP

|    |   |           |           |           |
|----|---|-----------|-----------|-----------|
| 1  | C | -1.429858 | -6.555819 | 0.425526  |
| 2  | C | -2.097065 | 5.939765  | 1.497436  |
| 3  | H | -1.531584 | 5.620277  | 2.366312  |
| 4  | C | 4.769104  | 4.474285  | -0.632740 |
| 5  | H | 4.688389  | 5.122124  | -1.500191 |
| 6  | C | 2.728751  | 5.554787  | 0.413126  |
| 7  | C | -2.097463 | -5.940010 | 1.497485  |
| 8  | H | -1.532027 | -5.620740 | 2.366470  |
| 9  | C | 0.827954  | -6.556188 | 1.562055  |
| 10 | H | 0.383141  | -6.909279 | 2.487310  |

|    |   |           |           |           |
|----|---|-----------|-----------|-----------|
| 11 | C | 2.139201  | -6.093221 | 1.571705  |
| 12 | H | 2.694815  | -6.098408 | 2.504155  |
| 13 | C | 2.006045  | -5.663951 | -0.787677 |
| 14 | H | 2.426978  | -5.264141 | -1.704152 |
| 15 | C | -2.209710 | -6.953548 | -0.674699 |
| 16 | H | -1.746228 | -7.494584 | -1.494058 |
| 17 | C | -3.434301 | 5.580389  | 1.399652  |
| 18 | H | -3.866205 | 4.987281  | 2.197295  |
| 19 | C | 2.006410  | 5.664036  | -0.787606 |
| 20 | H | 2.427343  | 5.264281  | -1.704105 |
| 21 | C | -5.416369 | 5.053395  | -0.016357 |
| 22 | C | 4.768828  | -4.474407 | -0.632801 |
| 23 | H | 4.688073  | -5.122220 | -1.500267 |
| 24 | C | 6.359394  | -1.164026 | 0.267410  |
| 25 | C | 0.828292  | 6.556126  | 1.562170  |
| 26 | H | 0.383452  | 6.909165  | 2.487433  |
| 27 | C | 2.728426  | -5.554827 | 0.413051  |
| 28 | C | -1.429500 | 6.555847  | 0.425606  |
| 29 | C | 0.050201  | -6.506268 | 0.391543  |
| 30 | C | 2.139519  | 6.093129  | 1.571813  |
| 31 | H | 2.695129  | 6.098248  | 2.504266  |
| 32 | C | 5.653025  | -3.398735 | -0.673029 |
| 33 | H | 6.214617  | -3.209785 | -1.582026 |
| 34 | C | 4.996230  | 2.785246  | 1.556743  |
| 35 | H | 5.069026  | 2.122889  | 2.413657  |
| 36 | C | 0.050561  | 6.506305  | 0.391629  |
| 37 | C | -3.434698 | -5.580600 | 1.399752  |
| 38 | H | -3.866587 | -4.987712 | 2.197566  |
| 39 | C | 6.359481  | 1.163778  | 0.267419  |
| 40 | C | 3.926212  | 4.683992  | 0.472585  |
| 41 | C | -5.416698 | -5.053190 | -0.016281 |
| 42 | C | 8.522495  | -1.591252 | -0.913736 |
| 43 | H | 8.338285  | -2.654651 | -0.779401 |
| 44 | C | 4.109115  | 3.851801  | 1.591724  |
| 45 | H | 3.481623  | 3.985208  | 2.466539  |
| 46 | C | 0.696442  | -6.131065 | -0.798606 |
| 47 | H | 0.128775  | -6.083456 | -1.722174 |
| 48 | C | 5.736993  | 2.488735  | 0.397524  |
| 49 | C | -3.554129 | -6.604569 | -0.766343 |
| 50 | H | -4.108134 | -6.889222 | -1.654956 |
| 51 | C | 5.653235  | 3.398560  | -0.672996 |
| 52 | H | 6.214791  | 3.209597  | -1.582011 |
| 53 | C | 0.696814  | 6.131194  | -0.798530 |
| 54 | H | 0.129166  | 6.083685  | -1.722117 |
| 55 | C | 7.541271  | -0.750054 | -0.402062 |

|     |   |           |           |           |
|-----|---|-----------|-----------|-----------|
| 56  | C | -2.209358 | 6.953815  | -0.674524 |
| 57  | H | -1.745863 | 7.495008  | -1.493774 |
| 58  | C | 4.108894  | -3.851958 | 1.591693  |
| 59  | H | 3.481406  | -3.985367 | 2.466511  |
| 60  | C | 7.541417  | 0.749731  | -0.401900 |
| 61  | C | 3.925931  | -4.684095 | 0.472524  |
| 62  | C | 5.736830  | -2.488949 | 0.397517  |
| 63  | C | -4.175362 | 5.827746  | 0.229848  |
| 64  | C | 4.996071  | -2.785451 | 1.556738  |
| 65  | H | 5.068912  | -2.123121 | 2.413669  |
| 66  | C | 8.522823  | 1.590839  | -0.913388 |
| 67  | H | 8.338802  | 2.654249  | -0.778891 |
| 68  | C | -4.175726 | -5.827623 | 0.229861  |
| 69  | C | 5.686546  | -0.000106 | 0.682982  |
| 70  | H | 4.717218  | -0.000076 | 1.166197  |
| 71  | C | -3.553793 | 6.604881  | -0.766214 |
| 72  | H | -4.107843 | 6.889707  | -1.654747 |
| 73  | C | -6.122968 | 4.434139  | 1.031108  |
| 74  | H | -5.956269 | 4.746334  | 2.056535  |
| 75  | C | -6.123049 | -4.433720 | 1.031232  |
| 76  | H | -5.956194 | -4.745767 | 2.056677  |
| 77  | C | -7.128603 | -2.831545 | -0.504794 |
| 78  | C | -6.947388 | -3.339537 | 0.794292  |
| 79  | H | -7.361465 | -2.806933 | 1.643918  |
| 80  | C | -5.766380 | -4.675296 | -1.325816 |
| 81  | H | -5.285417 | -5.151805 | -2.172995 |
| 82  | C | 9.713168  | 1.264225  | -1.569881 |
| 83  | H | 10.320206 | 2.107252  | -1.887433 |
| 84  | C | -6.947354 | 3.339991  | 0.794149  |
| 85  | H | -7.361638 | 2.807539  | 1.643770  |
| 86  | C | -7.128370 | 2.831850  | -0.504906 |
| 87  | C | 9.712904  | -1.264740 | -1.570172 |
| 88  | H | 10.319774 | -2.107823 | -1.887894 |
| 89  | C | -5.765812 | 4.675362  | -1.325912 |
| 90  | H | -5.284592 | 5.151719  | -2.173035 |
| 91  | C | 10.229891 | -0.000281 | -1.862030 |
| 92  | H | 11.183410 | -0.000320 | -2.385328 |
| 93  | C | -6.613754 | -3.600516 | -1.564383 |
| 94  | H | -6.798087 | -3.299841 | -2.590346 |
| 95  | C | -6.613237 | 3.600630  | -1.564502 |
| 96  | H | -6.797383 | 3.299830  | -2.590460 |
| 97  | C | -7.552149 | -1.425175 | -0.704185 |
| 98  | C | -7.552014 | 1.425506  | -0.704249 |
| 99  | C | -8.288147 | -0.696178 | 0.248762  |
| 100 | H | -8.818228 | -1.220143 | 1.037959  |

|     |   |           |           |           |
|-----|---|-----------|-----------|-----------|
| 101 | C | -8.288083 | 0.696613  | 0.248729  |
| 102 | H | -8.818128 | 1.220655  | 1.037897  |
| 103 | C | -6.970650 | 0.693348  | -1.754643 |
| 104 | H | -6.392977 | 1.206838  | -2.514353 |
| 105 | C | -6.970717 | -0.693114 | -1.754615 |
| 106 | H | -6.393105 | -1.206704 | -2.514303 |

**Optimized S<sub>0</sub> geometry of 1,3-Az[9]CPP-H<sup>+</sup>**

|    |   |           |           |           |
|----|---|-----------|-----------|-----------|
| 1  | C | 1.788872  | 6.046550  | 0.112247  |
| 2  | C | 1.792556  | -6.159742 | 1.019348  |
| 3  | H | 1.233145  | -6.311446 | 1.936981  |
| 4  | C | -4.933256 | -3.283998 | -0.740146 |
| 5  | H | -4.620145 | -3.421423 | -1.769288 |
| 6  | C | -3.005316 | -4.702542 | 0.035186  |
| 7  | C | 2.441839  | 5.641779  | 1.287553  |
| 8  | H | 1.860108  | 5.448603  | 2.182905  |
| 9  | C | -0.518013 | 6.226709  | 1.138240  |
| 10 | H | -0.114393 | 6.758159  | 1.994377  |
| 11 | C | -1.839361 | 5.793168  | 1.166756  |
| 12 | H | -2.443384 | 6.008416  | 2.042042  |
| 13 | C | -1.587658 | 4.878847  | -1.040773 |
| 14 | H | -1.963070 | 4.304645  | -1.880443 |
| 15 | C | 2.588439  | 6.296190  | -1.016053 |
| 16 | H | 2.131234  | 6.676236  | -1.924544 |
| 17 | C | 3.175922  | -6.026004 | 1.087588  |
| 18 | H | 3.663053  | -6.110340 | 2.053489  |
| 19 | C | -2.138822 | -4.237740 | -0.968047 |
| 20 | H | -2.445498 | -3.417477 | -1.607525 |
| 21 | C | 5.276101  | -5.069525 | 0.049491  |
| 22 | C | -4.378767 | 3.854503  | -0.879793 |
| 23 | H | -4.111473 | 4.206963  | -1.869743 |
| 24 | C | -6.625456 | 1.224654  | 0.637781  |
| 25 | C | -1.247175 | -6.238563 | 0.738543  |
| 26 | H | -0.918278 | -7.029446 | 1.405319  |
| 27 | C | -2.383571 | 5.046858  | 0.105586  |
| 28 | C | 1.104404  | -5.974758 | -0.192365 |
| 29 | C | 0.313883  | 5.943424  | 0.041417  |
| 30 | C | -2.545681 | -5.747887 | 0.855305  |
| 31 | H | -3.203345 | -6.170505 | 1.608352  |
| 32 | C | -5.403617 | 2.921790  | -0.756592 |
| 33 | H | -5.870480 | 2.538606  | -1.657757 |
| 34 | C | -5.801938 | -2.939166 | 1.874481  |
| 35 | H | -6.122213 | -2.796877 | 2.902547  |
| 36 | C | -0.351808 | -5.705697 | -0.204954 |

|    |   |           |           |           |
|----|---|-----------|-----------|-----------|
| 37 | C | 3.794993  | 5.330358  | 1.284671  |
| 38 | H | 4.219352  | 4.900341  | 2.183809  |
| 39 | C | -7.264460 | -0.985581 | 1.232876  |
| 40 | C | -4.271947 | -3.976860 | 0.289022  |
| 41 | C | 5.850391  | 4.679242  | 0.014275  |
| 42 | C | -8.454439 | 1.763268  | -1.031654 |
| 43 | H | -8.042468 | 2.765864  | -1.076761 |
| 44 | C | -4.762486 | -3.822669 | 1.596597  |
| 45 | H | -4.279540 | -4.342126 | 2.417168  |
| 46 | C | -0.271779 | 5.322937  | -1.074789 |
| 47 | H | 0.343376  | 5.086153  | -1.936495 |
| 48 | C | -6.378098 | -2.174350 | 0.854854  |
| 49 | C | 3.948292  | 6.002842  | -1.011637 |
| 50 | H | 4.516190  | 6.171260  | -1.920116 |
| 51 | C | -5.955804 | -2.383234 | -0.462076 |
| 52 | H | -6.401584 | -1.821066 | -1.276075 |
| 53 | C | -0.846556 | -4.727528 | -1.085516 |
| 54 | H | -0.180289 | -4.274994 | -1.811189 |
| 55 | C | -7.804886 | 0.874801  | -0.159811 |
| 56 | C | 1.878290  | -5.824614 | -1.355808 |
| 57 | H | 1.389135  | -5.748303 | -2.321417 |
| 58 | C | -4.084010 | 3.851683  | 1.504992  |
| 59 | H | -3.555315 | 4.169467  | 2.396376  |
| 60 | C | -8.191025 | -0.461581 | 0.157892  |
| 61 | C | -3.653951 | 4.295844  | 0.240811  |
| 62 | C | -5.764552 | 2.412785  | 0.501897  |
| 63 | C | 3.929461  | -5.682223 | -0.049288 |
| 64 | C | -5.120361 | 2.937165  | 1.634128  |
| 65 | H | -5.402160 | 2.584190  | 2.620905  |
| 66 | C | -9.214421 | -1.228031 | -0.367656 |
| 67 | H | -9.291666 | -2.240562 | 0.019033  |
| 68 | C | 4.567586  | 5.420159  | 0.111560  |
| 69 | C | -6.365629 | 0.188695  | 1.479495  |
| 70 | H | -5.537476 | 0.139645  | 2.174402  |
| 71 | C | 3.256931  | -5.673803 | -1.285053 |
| 72 | H | 3.802236  | -5.440948 | -2.193004 |
| 73 | C | 5.605174  | -4.319378 | 1.192268  |
| 74 | H | 4.979656  | -4.380664 | 2.075792  |
| 75 | C | 6.472380  | 4.129557  | 1.150813  |
| 76 | H | 6.207371  | 4.480204  | 2.141856  |
| 77 | C | 7.656288  | 2.480565  | -0.201021 |
| 78 | C | 7.338530  | 3.048465  | 1.046836  |
| 79 | H | 7.676696  | 2.574379  | 1.961325  |
| 80 | C | 6.345531  | 4.256346  | -1.233647 |
| 81 | H | 5.951741  | 4.682879  | -2.149093 |



|     |   |            |           |           |
|-----|---|------------|-----------|-----------|
| 82  | C | -10.153497 | -0.871878 | -1.347767 |
| 83  | H | -10.857922 | -1.649885 | -1.625144 |
| 84  | C | 6.611282   | -3.362124 | 1.158458  |
| 85  | H | 6.738817   | -2.706431 | 2.013293  |
| 86  | C | 7.328057   | -3.105992 | -0.023009 |
| 87  | C | -9.560359  | 1.525355  | -1.835252 |
| 88  | H | -9.891298  | 2.369876  | -2.432299 |
| 89  | C | 6.137255   | -4.959538 | -1.058821 |
| 90  | H | 5.977090   | -5.584703 | -1.931425 |
| 91  | C | -10.307509 | 0.347067  | -1.995115 |
| 92  | H | -11.119928 | 0.402703  | -2.712971 |
| 93  | C | 7.238662   | 3.197347  | -1.338021 |
| 94  | H | 7.532291   | 2.867662  | -2.328504 |
| 95  | C | 7.138872   | -3.994953 | -1.096646 |
| 96  | H | 7.731210   | -3.881665 | -1.999491 |
| 97  | C | 8.101883   | 1.067776  | -0.290002 |
| 98  | C | 7.949234   | -1.771391 | -0.190062 |
| 99  | C | 8.568708   | 0.351243  | 0.829748  |
| 100 | H | 8.925344   | 0.883273  | 1.705380  |
| 101 | C | 8.485685   | -1.036708 | 0.882501  |
| 102 | H | 8.768836   | -1.548524 | 1.797264  |
| 103 | C | 7.702779   | -1.072861 | -1.384110 |
| 104 | H | 7.305712   | -1.604371 | -2.242362 |
| 105 | C | 7.772745   | 0.312686  | -1.430900 |
| 106 | H | 7.427059   | 0.808838  | -2.329893 |
| 107 | H | -7.856628  | -1.245025 | 2.121932  |

**Optimized S<sub>1</sub> geometry of 1,3-Az[9]CPP**

|    |   |           |           |           |
|----|---|-----------|-----------|-----------|
| 1  | C | -1.416698 | -6.456296 | 0.135655  |
| 2  | C | -2.110229 | 5.993205  | 1.259704  |
| 3  | H | -1.567241 | 5.769276  | 2.172498  |
| 4  | C | 4.816871  | 4.325968  | -0.637993 |
| 5  | H | 4.743566  | 4.909164  | -1.550807 |
| 6  | C | 2.732542  | 5.430649  | 0.271906  |
| 7  | C | -2.110234 | -5.993205 | 1.259701  |
| 8  | H | -1.567248 | -5.769277 | 2.172497  |
| 9  | C | 0.840242  | -6.573153 | 1.276945  |
| 10 | H | 0.397824  | -7.048647 | 2.147274  |
| 11 | C | 2.148428  | -6.110108 | 1.349205  |
| 12 | H | 2.703868  | -6.234861 | 2.274015  |
| 13 | C | 2.009888  | -5.365562 | -0.925130 |
| 14 | H | 2.429486  | -4.845237 | -1.780221 |
| 15 | C | -2.161788 | -6.735029 | -1.017777 |
| 16 | H | -1.669818 | -7.157895 | -1.888796 |
| 17 | C | -3.455619 | 5.661723  | 1.182393  |

|    |   |           |           |           |
|----|---|-----------|-----------|-----------|
| 18 | H | -3.926825 | 5.185298  | 2.036160  |
| 19 | C | 2.009886  | 5.365561  | -0.925137 |
| 20 | H | 2.429482  | 4.845235  | -1.780229 |
| 21 | C | -5.412981 | 4.998471  | -0.191503 |
| 22 | C | 4.816875  | -4.325972 | -0.637974 |
| 23 | H | 4.743580  | -4.909176 | -1.550783 |
| 24 | C | 6.430105  | -1.133990 | 0.509485  |
| 25 | C | 0.840249  | 6.573157  | 1.276939  |
| 26 | H | 0.397834  | 7.048653  | 2.147268  |
| 27 | C | 2.732539  | -5.430646 | 0.271916  |
| 28 | C | -1.416696 | 6.456297  | 0.135657  |
| 29 | C | 0.067188  | -6.370587 | 0.126094  |
| 30 | C | 2.148435  | 6.110113  | 1.349195  |
| 31 | H | 2.703878  | 6.234869  | 2.274003  |
| 32 | C | 5.726136  | -3.276533 | -0.578374 |
| 33 | H | 6.322324  | -3.039915 | -1.453325 |
| 34 | C | 5.012537  | 2.798883  | 1.668715  |
| 35 | H | 5.072491  | 2.197094  | 2.570047  |
| 36 | C | 0.067191  | 6.370588  | 0.126091  |
| 37 | C | -3.455624 | -5.661724 | 1.182387  |
| 38 | H | -3.926833 | -5.185300 | 2.036154  |
| 39 | C | 6.430109  | 1.133994  | 0.509479  |
| 40 | C | 3.945836  | 4.587947  | 0.426614  |
| 41 | C | -5.412983 | -4.998471 | -0.191512 |
| 42 | C | 8.587508  | -1.602603 | -0.750066 |
| 43 | H | 8.414453  | -2.659650 | -0.577169 |
| 44 | C | 4.112195  | 3.848028  | 1.606864  |
| 45 | H | 3.461051  | 4.035139  | 2.454646  |
| 46 | C | 0.702813  | -5.826381 | -0.996210 |
| 47 | H | 0.134328  | -5.652907 | -1.904351 |
| 48 | C | 5.791906  | 2.448996  | 0.553996  |
| 49 | C | -3.509701 | -6.404899 | -1.094471 |
| 50 | H | -4.044040 | -6.575285 | -2.024523 |
| 51 | C | 5.726132  | 3.276529  | -0.578393 |
| 52 | H | 6.322309  | 3.039903  | -1.453349 |
| 53 | C | 0.702812  | 5.826380  | -0.996214 |
| 54 | H | 0.134323  | 5.652904  | -1.904352 |
| 55 | C | 7.612787  | -0.702890 | -0.222372 |
| 56 | C | -2.161788 | 6.735031  | -1.017773 |
| 57 | H | -1.669820 | 7.157899  | -1.888793 |
| 58 | C | 4.112180  | -3.848015 | 1.606873  |
| 59 | H | 3.461030  | -4.035119 | 2.454652  |
| 60 | C | 7.612794  | 0.702885  | -0.222370 |
| 61 | C | 3.945831  | -4.587942 | 0.426627  |
| 62 | C | 5.791899  | -2.448990 | 0.554008  |

|     |   |           |           |           |
|-----|---|-----------|-----------|-----------|
| 63  | C | -4.160318 | 5.781340  | -0.021381 |
| 64  | C | 5.012522  | -2.798868 | 1.668723  |
| 65  | H | 5.072468  | -2.197073 | 2.570052  |
| 66  | C | 8.587527  | 1.602590  | -0.750057 |
| 67  | H | 8.414486  | 2.659638  | -0.577155 |
| 68  | C | -4.160320 | -5.781339 | -0.021388 |
| 69  | C | 5.782941  | 0.000004  | 1.016077  |
| 70  | H | 4.813618  | 0.000007  | 1.495379  |
| 71  | C | -3.509702 | 6.404901  | -1.094464 |
| 72  | H | -4.044043 | 6.575288  | -2.024515 |
| 73  | C | -6.294140 | 4.744817  | 0.868322  |
| 74  | H | -6.244167 | 5.349808  | 1.768906  |
| 75  | C | -6.294144 | -4.744819 | 0.868313  |
| 76  | H | -6.244172 | -5.349812 | 1.768896  |
| 77  | C | -7.203396 | -2.809597 | -0.282626 |
| 78  | C | -7.174101 | -3.669706 | 0.823438  |
| 79  | H | -7.792507 | -3.456142 | 1.690344  |
| 80  | C | -5.579450 | -4.252048 | -1.363890 |
| 81  | H | -4.920594 | -4.423546 | -2.209154 |
| 82  | C | 9.735604  | 1.264307  | -1.446672 |
| 83  | H | 10.338136 | 2.107864  | -1.778668 |
| 84  | C | -7.174098 | 3.669704  | 0.823445  |
| 85  | H | -7.792503 | 3.456139  | 1.690352  |
| 86  | C | -7.203395 | 2.809598  | -0.282620 |
| 87  | C | 9.735587  | -1.264331 | -1.446681 |
| 88  | H | 10.338108 | -2.107893 | -1.778682 |
| 89  | C | -5.579449 | 4.252050  | -1.363883 |
| 90  | H | -4.920594 | 4.423551  | -2.209147 |
| 91  | C | 10.251658 | -0.000014 | -1.783862 |
| 92  | H | 11.178778 | -0.000018 | -2.348244 |
| 93  | C | -6.457563 | -3.178503 | -1.408543 |
| 94  | H | -6.458608 | -2.541094 | -2.286944 |
| 95  | C | -6.457562 | 3.178505  | -1.408537 |
| 96  | H | -6.458609 | 2.541099  | -2.286939 |
| 97  | C | -7.711972 | -1.414458 | -0.200056 |
| 98  | C | -7.711971 | 1.414459  | -0.200053 |
| 99  | C | -7.485886 | -0.693851 | 0.978632  |
| 100 | H | -7.169133 | -1.215740 | 1.875982  |
| 101 | C | -7.485885 | 0.693849  | 0.978634  |
| 102 | H | -7.169132 | 1.215736  | 1.875985  |
| 103 | C | -8.128831 | 0.695006  | -1.328255 |
| 104 | H | -8.383965 | 1.223539  | -2.242098 |
| 105 | C | -8.128831 | -0.695002 | -1.328256 |
| 106 | H | -8.383966 | -1.223533 | -2.242100 |

Optimized S<sub>2</sub> geometry of 1,3-Az[9]CPP

|    |   |           |           |           |
|----|---|-----------|-----------|-----------|
| 1  | C | -1.416949 | -6.249823 | 0.170173  |
| 2  | C | -2.102077 | 5.800681  | 1.308828  |
| 3  | H | -1.551800 | 5.599803  | 2.222538  |
| 4  | C | 4.891941  | 4.373943  | -0.688668 |
| 5  | H | 4.800246  | 4.979543  | -1.585649 |
| 6  | C | 2.772359  | 5.384124  | 0.256186  |
| 7  | C | -2.102505 | -5.800609 | 1.308855  |
| 8  | H | -1.552222 | -5.599789 | 2.222574  |
| 9  | C | 0.836139  | -6.411549 | 1.303201  |
| 10 | H | 0.381629  | -6.846264 | 2.188444  |
| 11 | C | 2.163800  | -6.007613 | 1.354479  |
| 12 | H | 2.719327  | -6.132013 | 2.279360  |
| 13 | C | 2.044251  | -5.323460 | -0.938800 |
| 14 | H | 2.481446  | -4.846865 | -1.810493 |
| 15 | C | -2.180015 | -6.499684 | -0.982300 |
| 16 | H | -1.703819 | -6.921789 | -1.862360 |
| 17 | C | -3.443995 | 5.467477  | 1.255320  |
| 18 | H | -3.895341 | 5.014646  | 2.131132  |
| 19 | C | 2.044665  | 5.323449  | -0.938773 |
| 20 | H | 2.481847  | 4.846837  | -1.810463 |
| 21 | C | -5.444836 | 4.845785  | -0.084269 |
| 22 | C | 4.891585  | -4.374116 | -0.688727 |
| 23 | H | 4.799834  | -4.979694 | -1.585717 |
| 24 | C | 6.560808  | -1.159047 | 0.359904  |
| 25 | C | 0.836578  | 6.411580  | 1.303221  |
| 26 | H | 0.382073  | 6.846305  | 2.188463  |
| 27 | C | 2.771958  | -5.384179 | 0.256149  |
| 28 | C | -1.416509 | 6.249935  | 0.170172  |
| 29 | C | 0.063019  | -6.209111 | 0.150277  |
| 30 | C | 2.164220  | 6.007582  | 1.354512  |
| 31 | H | 2.719742  | 6.131947  | 2.279401  |
| 32 | C | 5.819111  | -3.337799 | -0.664751 |
| 33 | H | 6.409341  | -3.134167 | -1.553209 |
| 34 | C | 5.142620  | 2.791651  | 1.570019  |
| 35 | H | 5.220018  | 2.165317  | 2.453706  |
| 36 | C | 0.063463  | 6.209181  | 0.150289  |
| 37 | C | -3.444414 | -5.467375 | 1.255373  |
| 38 | H | -3.895739 | -5.014582 | 2.131215  |
| 39 | C | 6.560905  | 1.158728  | 0.359932  |
| 40 | C | 4.018122  | 4.585612  | 0.385257  |
| 41 | C | -5.445247 | -4.845581 | -0.084187 |
| 42 | C | 8.788776  | -1.589048 | -0.673776 |
| 43 | H | 8.591552  | -2.653402 | -0.558760 |

|    |   |           |           |           |
|----|---|-----------|-----------|-----------|
| 44 | C | 4.211217  | 3.818255  | 1.541422  |
| 45 | H | 3.558155  | 3.961183  | 2.396731  |
| 46 | C | 0.718387  | -5.728367 | -0.991411 |
| 47 | H | 0.155088  | -5.556872 | -1.903149 |
| 48 | C | 5.910947  | 2.479817  | 0.440221  |
| 49 | C | -3.523018 | -6.167578 | -1.039577 |
| 50 | H | -4.064275 | -6.348061 | -1.962645 |
| 51 | C | 5.819392  | 3.337559  | -0.664696 |
| 52 | H | 6.409618  | 3.133900  | -1.553151 |
| 53 | C | 0.718819  | 5.728416  | -0.991395 |
| 54 | H | 0.155519  | 5.556952  | -1.903138 |
| 55 | C | 7.779501  | -0.747664 | -0.222007 |
| 56 | C | -2.179556 | 6.499865  | -0.982294 |
| 57 | H | -1.703342 | 6.921992  | -1.862333 |
| 58 | C | 4.210937  | -3.818421 | 1.541385  |
| 59 | H | 3.557880  | -3.961319 | 2.396702  |
| 60 | C | 7.779589  | 0.747258  | -0.221938 |
| 61 | C | 4.017770  | -4.585744 | 0.385210  |
| 62 | C | 5.910747  | -2.480086 | 0.440181  |
| 63 | C | -4.174836 | 5.558238  | 0.053550  |
| 64 | C | 5.142415  | -2.791885 | 1.569986  |
| 65 | H | 5.219875  | -2.165574 | 2.453685  |
| 66 | C | 8.788963  | 1.588565  | -0.673631 |
| 67 | H | 8.591852  | 2.652932  | -0.558543 |
| 68 | C | -4.175273 | -5.558057 | 0.053600  |
| 69 | C | 5.862284  | -0.000135 | 0.720166  |
| 70 | H | 4.860393  | -0.000098 | 1.135255  |
| 71 | C | -3.522569 | 6.167786  | -1.039595 |
| 72 | H | -4.063821 | 6.348310  | -1.962659 |
| 73 | C | -6.203575 | 4.432020  | 1.039421  |
| 74 | H | -6.024757 | 4.888822  | 2.007634  |
| 75 | C | -6.203899 | -4.431701 | 1.039532  |
| 76 | H | -6.025050 | -4.888454 | 2.007762  |
| 77 | C | -7.373686 | -2.736076 | -0.279950 |
| 78 | C | -7.135762 | -3.427660 | 0.950243  |
| 79 | H | -7.653443 | -3.125169 | 1.853290  |
| 80 | C | -5.856643 | -4.336098 | -1.339523 |
| 81 | H | -5.355598 | -4.662549 | -2.244568 |
| 82 | C | 10.015946 | 1.262510  | -1.247840 |
| 83 | H | 10.642069 | 2.104335  | -1.528813 |
| 84 | C | -7.135490 | 3.428018  | 0.950133  |
| 85 | H | -7.653246 | 3.125614  | 1.853165  |
| 86 | C | -7.373377 | 2.736380  | -0.280025 |
| 87 | C | 10.015797 | -1.263084 | -1.247956 |
| 88 | H | 10.641826 | -2.104956 | -1.528997 |

|     |   |           |           |           |
|-----|---|-----------|-----------|-----------|
| 89  | C | -5.856134 | 4.336214  | -1.339590 |
| 90  | H | -5.354971 | 4.662546  | -2.244614 |
| 91  | C | 10.549324 | -0.000307 | -1.501837 |
| 92  | H | 11.535225 | -0.000344 | -1.960889 |
| 93  | C | -6.788788 | -3.332322 | -1.440623 |
| 94  | H | -6.990134 | -2.921761 | -2.422834 |
| 95  | C | -6.788332 | 3.332478  | -1.440688 |
| 96  | H | -6.989591 | 2.921830  | -2.422880 |
| 97  | C | -7.943021 | -1.429964 | -0.320887 |
| 98  | C | -7.942851 | 1.430312  | -0.320928 |
| 99  | C | -8.218870 | -0.681840 | 0.876108  |
| 100 | H | -8.348273 | -1.196575 | 1.821328  |
| 101 | C | -8.218784 | 0.682260  | 0.876086  |
| 102 | H | -8.348114 | 1.197039  | 1.821292  |
| 103 | C | -8.051768 | 0.681582  | -1.544740 |
| 104 | H | -8.085588 | 1.199546  | -2.496764 |
| 105 | C | -8.051858 | -0.681254 | -1.544724 |
| 106 | H | -8.085744 | -1.199237 | -2.496735 |

**Optimized S<sub>1</sub> geometry of 1,3-Az[9]CPP-H<sup>+</sup>**

|    |   |           |           |           |
|----|---|-----------|-----------|-----------|
| 1  | C | -2.031483 | -5.573208 | -0.133010 |
| 2  | C | -1.547445 | 5.842755  | 0.840300  |
| 3  | H | -0.994688 | 6.051598  | 1.750970  |
| 4  | C | 5.132712  | 2.679314  | -0.622552 |
| 5  | H | 4.792717  | 2.713164  | -1.651138 |
| 6  | C | 3.201009  | 4.120339  | 0.064282  |
| 7  | C | -2.696097 | -5.710102 | 1.092244  |
| 8  | H | -2.127204 | -5.878695 | 2.001441  |
| 9  | C | 0.322690  | -5.922256 | 0.756902  |
| 10 | H | -0.028962 | -6.679350 | 1.450929  |
| 11 | C | 1.642029  | -5.492541 | 0.837919  |
| 12 | H | 2.294089  | -5.923195 | 1.591827  |
| 13 | C | 1.274893  | -4.020985 | -1.022562 |
| 14 | H | 1.613360  | -3.241568 | -1.697258 |
| 15 | C | -2.819889 | -5.403946 | -1.277832 |
| 16 | H | -2.353891 | -5.367740 | -2.257506 |
| 17 | C | -2.935526 | 5.825015  | 0.887467  |
| 18 | H | -3.431238 | 6.050772  | 1.826381  |
| 19 | C | 2.325510  | 3.564342  | -0.881745 |
| 20 | H | 2.614568  | 2.678673  | -1.436789 |
| 21 | C | -5.092661 | 4.950995  | -0.097048 |
| 22 | C | 4.178516  | -3.379315 | -0.946315 |
| 23 | H | 3.840564  | -3.597720 | -1.953672 |
| 24 | C | 6.780113  | -1.243342 | 0.714485  |

|    |   |           |           |           |
|----|---|-----------|-----------|-----------|
| 25 | C | 1.483762  | 5.754140  | 0.601498  |
| 26 | H | 1.176383  | 6.625202  | 1.171203  |
| 27 | C | 2.133113  | -4.506301 | -0.028512 |
| 28 | C | -0.861144 | 5.483484  | -0.327010 |
| 29 | C | -0.560981 | -5.369278 | -0.180192 |
| 30 | C | 2.762552  | 5.247922  | 0.779798  |
| 31 | H | 3.429322  | 5.739530  | 1.480840  |
| 32 | C | 5.301878  | -2.591100 | -0.769640 |
| 33 | H | 5.792608  | -2.171747 | -1.640692 |
| 34 | C | 6.063947  | 2.635887  | 2.005037  |
| 35 | H | 6.423717  | 2.607930  | 3.028482  |
| 36 | C | 0.581165  | 5.143450  | -0.282398 |
| 37 | C | -4.067229 | -5.508448 | 1.189443  |
| 38 | H | -4.533897 | -5.559054 | 2.168123  |
| 39 | C | 7.714163  | 0.793929  | 1.464239  |
| 40 | C | 4.470714  | 3.441477  | 0.357870  |
| 41 | C | -6.118366 | -4.412185 | 0.199732  |
| 42 | C | 8.410211  | -1.854493 | -1.137988 |
| 43 | H | 7.893543  | -2.806281 | -1.223635 |
| 44 | C | 4.998641  | 3.438051  | 1.672540  |
| 45 | H | 4.517793  | 4.026276  | 2.445976  |
| 46 | C | -0.043428 | -4.438660 | -1.091265 |
| 47 | H | -0.700870 | -3.968189 | -1.813947 |
| 48 | C | 6.677163  | 1.809755  | 1.034181  |
| 49 | C | -4.184390 | -5.175643 | -1.176817 |
| 50 | H | -4.735715 | -4.922441 | -2.076368 |
| 51 | C | 6.201462  | 1.871375  | -0.298320 |
| 52 | H | 6.669728  | 1.272420  | -1.070139 |
| 53 | C | 1.044953  | 4.060604  | -1.043849 |
| 54 | H | 0.368424  | 3.547284  | -1.717903 |
| 55 | C | 7.907390  | -0.968957 | -0.144207 |
| 56 | C | -1.619616 | 5.259441  | -1.482929 |
| 57 | H | -1.123717 | 5.042733  | -2.423875 |
| 58 | C | 3.944810  | -3.593000 | 1.441301  |
| 59 | H | 3.406007  | -3.958893 | 2.308940  |
| 60 | C | 8.528089  | 0.254086  | 0.305373  |
| 61 | C | 3.453620  | -3.863941 | 0.152475  |
| 62 | C | 5.745672  | -2.250560 | 0.522514  |
| 63 | C | -3.689681 | 5.426679  | -0.224229 |
| 64 | C | 5.058204  | -2.794839 | 1.624416  |
| 65 | H | 5.395539  | -2.571075 | 2.631076  |
| 66 | C | 9.602863  | 0.932026  | -0.191353 |
| 67 | H | 9.870763  | 1.856172  | 0.312918  |
| 68 | C | -4.822036 | -5.131719 | 0.070407  |
| 69 | C | 6.732660  | -0.298759 | 1.739262  |

|     |   |           |           |           |
|-----|---|-----------|-----------|-----------|
| 70  | H | 5.996533  | -0.255731 | 2.530552  |
| 71  | C | -3.004928 | 5.224625  | -1.430366 |
| 72  | H | -3.553703 | 4.938049  | -2.321465 |
| 73  | C | -5.467864 | 4.284607  | 1.075474  |
| 74  | H | -4.822139 | 4.314804  | 1.946655  |
| 75  | C | -6.322153 | -3.603491 | 1.324450  |
| 76  | H | -5.667789 | -3.694155 | 2.184725  |
| 77  | C | -7.961703 | -2.265004 | 0.140128  |
| 78  | C | -7.227922 | -2.554262 | 1.296867  |
| 79  | H | -7.247984 | -1.863007 | 2.133070  |
| 80  | C | -7.010065 | -4.256100 | -0.871768 |
| 81  | H | -6.947270 | -4.916533 | -1.731359 |
| 82  | C | 10.420229 | 0.571173  | -1.314564 |
| 83  | H | 11.198073 | 1.286051  | -1.565583 |
| 84  | C | -6.565019 | 3.437131  | 1.096001  |
| 85  | H | -6.737684 | 2.831399  | 1.979525  |
| 86  | C | -7.329661 | 3.217417  | -0.056223 |
| 87  | C | 9.467857  | -1.674921 | -1.985644 |
| 88  | H | 9.672447  | -2.489246 | -2.672926 |
| 89  | C | -5.973391 | 4.884613  | -1.186166 |
| 90  | H | -5.762451 | 5.449498  | -2.089313 |
| 91  | C | 10.354872 | -0.550000 | -2.089089 |
| 92  | H | 11.091019 | -0.622201 | -2.884662 |
| 93  | C | -7.912603 | -3.198680 | -0.903632 |
| 94  | H | -8.523312 | -3.052247 | -1.789805 |
| 95  | C | -7.071870 | 4.032475  | -1.166774 |
| 96  | H | -7.687831 | 3.944395  | -2.056932 |
| 97  | C | -8.417819 | -0.860773 | -0.042850 |
| 98  | C | -8.088205 | 1.940698  | -0.143570 |
| 99  | C | -8.812667 | -0.053893 | 1.033506  |
| 100 | H | -9.155236 | -0.512929 | 1.956309  |
| 101 | C | -8.650668 | 1.325175  | 0.983671  |
| 102 | H | -8.872069 | 1.915273  | 1.868207  |
| 103 | C | -7.927882 | 1.158055  | -1.293020 |
| 104 | H | -7.515775 | 1.601750  | -2.193821 |
| 105 | C | -8.090704 | -0.219758 | -1.243638 |
| 106 | H | -7.800133 | -0.810182 | -2.106841 |
| 107 | H | 8.312172  | 1.145764  | 2.307242  |

**Optimized S<sub>2</sub> geometry of 1,3-Az[9]CPP-H<sup>+</sup>**

|   |   |           |           |           |
|---|---|-----------|-----------|-----------|
| 1 | C | -1.980024 | -5.897733 | -0.162841 |
| 2 | C | -1.587338 | 6.130108  | 0.874890  |
| 3 | H | -1.040424 | 6.321234  | 1.792254  |
| 4 | C | 5.128093  | 3.190472  | -0.696789 |



|    |   |           |           |           |
|----|---|-----------|-----------|-----------|
| 5  | H | 4.877392  | 3.359245  | -1.737770 |
| 6  | C | 3.192307  | 4.613574  | 0.020013  |
| 7  | C | -2.641766 | -5.977521 | 1.070299  |
| 8  | H | -2.076641 | -6.155311 | 1.979710  |
| 9  | C | 0.354482  | -6.266669 | 0.764682  |
| 10 | H | -0.021815 | -6.972764 | 1.497901  |
| 11 | C | 1.676748  | -5.855286 | 0.845044  |
| 12 | H | 2.304274  | -6.250875 | 1.637368  |
| 13 | C | 1.373765  | -4.508030 | -1.120976 |
| 14 | H | 1.734056  | -3.781318 | -1.840657 |
| 15 | C | -2.770583 | -5.716291 | -1.305934 |
| 16 | H | -2.314606 | -5.728391 | -2.290605 |
| 17 | C | -2.968307 | 6.017509  | 0.937243  |
| 18 | H | -3.461031 | 6.159108  | 1.893512  |
| 19 | C | 2.383275  | 4.202070  | -1.055872 |
| 20 | H | 2.722776  | 3.418871  | -1.723748 |
| 21 | C | -5.076526 | 5.054995  | -0.061364 |
| 22 | C | 4.211812  | -3.725098 | -0.970213 |
| 23 | H | 3.903354  | -3.962725 | -1.982186 |
| 24 | C | 6.604179  | -1.384109 | 0.725316  |
| 25 | C | 1.412066  | 6.123697  | 0.696635  |
| 26 | H | 1.058556  | 6.898266  | 1.368594  |
| 27 | C | 2.203568  | -4.927859 | -0.069825 |
| 28 | C | -0.894510 | 5.883062  | -0.319975 |
| 29 | C | -0.505943 | -5.753404 | -0.219467 |
| 30 | C | 2.690696  | 5.625410  | 0.863696  |
| 31 | H | 3.309702  | 6.022236  | 1.661268  |
| 32 | C | 5.269718  | -2.860750 | -0.776388 |
| 33 | H | 5.751369  | -2.404847 | -1.634607 |
| 34 | C | 5.833450  | 2.798475  | 1.967993  |
| 35 | H | 6.099692  | 2.628517  | 3.006232  |
| 36 | C | 0.558910  | 5.616440  | -0.301838 |
| 37 | C | -3.999082 | -5.705076 | 1.173018  |
| 38 | H | -4.459178 | -5.714287 | 2.155798  |
| 39 | C | 7.231474  | 0.800170  | 1.354638  |
| 40 | C | 4.419215  | 3.876773  | 0.316933  |
| 41 | C | -6.002082 | -4.530320 | 0.179402  |
| 42 | C | 8.432639  | -1.960572 | -0.942178 |
| 43 | H | 8.010377  | -2.961435 | -0.990802 |
| 44 | C | 4.850569  | 3.710069  | 1.654404  |
| 45 | H | 4.344075  | 4.237993  | 2.454080  |
| 46 | C | 0.051415  | -4.905394 | -1.188291 |
| 47 | H | -0.579994 | -4.471589 | -1.955205 |
| 48 | C | 6.436229  | 2.015820  | 0.962315  |
| 49 | C | -4.120243 | -5.418378 | -1.199630 |

|    |   |           |           |           |
|----|---|-----------|-----------|-----------|
| 50 | H | -4.666046 | -5.161019 | -2.101199 |
| 51 | C | 6.121088  | 2.289861  | -0.383416 |
| 52 | H | 6.628078  | 1.750596  | -1.175191 |
| 53 | C | 1.098430  | 4.684278  | -1.204569 |
| 54 | H | 0.473673  | 4.258814  | -1.980980 |
| 55 | C | 7.767606  | -1.060738 | -0.055294 |
| 56 | C | -1.658475 | 5.683766  | -1.479566 |
| 57 | H | -1.170107 | 5.564736  | -2.441057 |
| 58 | C | 3.984866  | -3.991172 | 1.418769  |
| 59 | H | 3.468530  | -4.399582 | 2.280720  |
| 60 | C | 8.189394  | 0.265879  | 0.296459  |
| 61 | C | 3.502360  | -4.260627 | 0.122401  |
| 62 | C | 5.681769  | -2.507735 | 0.524589  |
| 63 | C | -3.713018 | 5.629559  | -0.185729 |
| 64 | C | 5.047051  | -3.130382 | 1.616351  |
| 65 | H | 5.369513  | -2.890553 | 2.624164  |
| 66 | C | 9.222605  | 1.015842  | -0.176789 |
| 67 | H | 9.338370  | 2.011446  | 0.241521  |
| 68 | C | -4.743459 | -5.311739 | 0.051945  |
| 69 | C | 6.292961  | -0.369901 | 1.584935  |
| 70 | H | 5.436813  | -0.318667 | 2.243342  |
| 71 | C | -3.035970 | 5.553040  | -1.412027 |
| 72 | H | -3.577581 | 5.288838  | -2.314031 |
| 73 | C | -5.403039 | 4.350202  | 1.104189  |
| 74 | H | -4.755482 | 4.405892  | 1.972448  |
| 75 | C | -6.172377 | -3.715195 | 1.305614  |
| 76 | H | -5.520805 | -3.830747 | 2.164777  |
| 77 | C | -7.773021 | -2.321628 | 0.131917  |
| 78 | C | -7.042805 | -2.636878 | 1.284210  |
| 79 | H | -7.040377 | -1.949658 | 2.123901  |
| 80 | C | -6.887026 | -4.336598 | -0.892108 |
| 81 | H | -6.850837 | -4.996857 | -1.753192 |
| 82 | C | 10.176549 | 0.651889  | -1.199358 |
| 83 | H | 10.884295 | 1.433275  | -1.460337 |
| 84 | C | -6.450571 | 3.443148  | 1.121753  |
| 85 | H | -6.585013 | 2.820264  | 1.999885  |
| 86 | C | -7.212031 | 3.196366  | -0.027290 |
| 87 | C | 9.522425  | -1.734081 | -1.724577 |
| 88 | H | 9.859371  | -2.569055 | -2.330472 |
| 89 | C | -5.957692 | 4.947536  | -1.147763 |
| 90 | H | -5.789044 | 5.536344  | -2.044274 |
| 91 | C | 10.302406 | -0.523461 | -1.862859 |
| 92 | H | 11.103686 | -0.579687 | -2.593843 |
| 93 | C | -7.752838 | -3.249359 | -0.918261 |
| 94 | H | -8.362021 | -3.080012 | -1.801310 |

|     |   |           |           |           |
|-----|---|-----------|-----------|-----------|
| 95  | C | -7.005055 | 4.034171  | -1.131918 |
| 96  | H | -7.622815 | 3.922964  | -2.018117 |
| 97  | C | -8.214780 | -0.911886 | -0.033327 |
| 98  | C | -7.924188 | 1.894759  | -0.114922 |
| 99  | C | -8.607349 | -0.118701 | 1.054159  |
| 100 | H | -8.940373 | -0.589683 | 1.974335  |
| 101 | C | -8.464392 | 1.262082  | 1.013864  |
| 102 | H | -8.690242 | 1.843233  | 1.903068  |
| 103 | C | -7.754596 | 1.122407  | -1.270117 |
| 104 | H | -7.357055 | 1.579982  | -2.170526 |
| 105 | C | -7.898123 | -0.257922 | -1.230055 |
| 106 | H | -7.607950 | -0.838719 | -2.099911 |
| 107 | H | 7.770014  | 1.028323  | 2.288234  |

## References

- (1) (a) Yakura, T.; Omoto, M.; Yamauchi, Y.; Tian, Y.; Ozono, A., Hypervalent iodine oxidation of phenol derivatives using a catalytic amount of 4-iodophenoxyacetic acid and Oxone® as a co-oxidant. *Tetrahedron*, **2010**, *66* (31), 5833-5840; (b) Abdulkarim, A.; Hinkel, F.; Jansch, D.; Freudenberg, J.; Golling, F. E.; Mullen, K., A New Solution to an Old Problem: Synthesis of Unsubstituted Poly(para-phenylene). *J. Am. Chem. Soc.* **2011**, *133* (40), 15800-15802.
- (2) Abdulkarim, A.; Hinkel, F.; Jansch, D.; Freudenberg, J.; Golling, F. E.; Mullen, K., A New Solution to an Old Problem: Synthesis of Unsubstituted Poly(para-phenylene). *J. Am. Chem. Soc.* **2016**, *138* (50), 16208-16211.
- (3) Darzi, E. R.; Sisto, T. J.; Jasti, R., Selective syntheses of [7]-[12]cycloparaphenylenes using orthogonal Suzuki-Miyaura cross-coupling reactions. *J Org Chem* **2012**, *77* (15), 6624-6628.
- (4) Chen, M.; Unikela, K. S.; Ramalakshmi, R.; Li, B.; Darrigan, C.; Chrostowska, A.; Liu, S. Y., A BN-Doped Cycloparaphenylene Debuts. *Angew. Chem. Int. Ed.* **2021**, *60* (3), 1556-1560.
- (5) Bredihhin, A.; Dubovik, J., A Convenient Synthesis of Functionalized Azulenes via Negishi Cross-Coupling. *Synthesis* **2015**, *47* (04), 538-548.
- (6) Dolomanov, O. V.; Bourhis, L. J.; Gildea, R. J.; Howard, J. A. K.; Puschmann, H., OLEX2: a complete structure solution, refinement and analysis program. *J. Appl. Cryst.* **2009**, *42* (2), 339-341.
- (7) Sheldrick, G. M., SHELXT-integrated space-group and crystal-structure determination. *Acta Cryst.* **2015**, *A71*, 3-8.
- (8) Spek, A. L., PLATON SQUEEZE: a tool for the calculation of the disordered solvent contribution to the calculated structure factors. *Acta Cryst.* **2015**, *C71*, 9-18.
- (9) (a) Thordarson, P., Determining association constants from titration experiments in supramolecular chemistry. *Chem. Soc. Rev.*, **2011**, *40* (3), 1305-1323; (b) Brynn Hibbert, D.; Thordarson, P., The death of the Job plot, transparency, open science and online tools, uncertainty estimation methods and other developments in supramolecular chemistry data analysis. *Chem. Commun.*, **2016**, *52* (87), 12792-12805.
- (10) M.J. Frisch, G.W.Trucks, H.B.Schlegel, et al. Gaussian 16, Revision B.01; Gaussian, Inc., Wallingford CT, **2016**.
- (11) Lu, T.; Chen, F., Multiwfn: a multifunctional wavefunction analyzer. *J. Comput. Chem.* **2012**, *33* (5), 580-592.
